1 **Pneumococcal metabolic adaptation and colonization is regulated by**  
2 **the two-component regulatory system 08**

3  
4 Alejandro Gómez-Mejía<sup>1</sup>, Gustavo Gámez<sup>2,3</sup>, Stephanie Hirschmann<sup>1</sup>, Viktor Kluger<sup>1</sup>,  
5 Hermann Rath<sup>4</sup>, Sebastian Böhm<sup>1</sup>, Franziska Voss<sup>1</sup>, Niamatullah Kakar<sup>1</sup>, Lothar  
6 Petruschka<sup>1</sup>, Uwe Völker<sup>4</sup>, Reinhold Brückner<sup>5</sup>, Ulrike Mäder<sup>4</sup> and Sven  
7 Hammerschmidt<sup>1#</sup>

8  
9 Department of Molecular Genetics and Infection Biology, Interfaculty Institute for  
10 Genetics and Functional Genomics, Center for Functional Genomics of Microbes,  
11 University of Greifswald, Greifswald, Germany<sup>1</sup>; Genetics, Regeneration and Cancer  
12 (GRC) Research Group, University Research Center (SIU), Universidad de Antioquia,  
13 UdeA, Medellin, Colombia<sup>2</sup>; Basic and Applied Microbiology (MICROBA) Research  
14 Group, School of Microbiology, Universidad de Antioquia, UdeA, Medellin, Colombia<sup>3</sup>;  
15 Department of Functional Genomics, Interfaculty Institute for Genetics and Functional  
16 Genomics, Center for Functional Genomics of Microbes, University Medicine Greifswald,  
17 Greifswald, Germany<sup>4</sup>; Department of Microbiology, University of Kaiserslautern,  
18 Kaiserslautern, Germany<sup>5</sup>.

19  
20 **Running head:** Impact of TCS08 on Pneumococcal Colonization

21 # Address correspondence to Prof. Dr. Sven Hammerschmidt,  
22 sven.hammerschmidt@uni-greifswald.de

23  
24 **Abstract word count:** 227

25 **Importance word count:** 101

26 **Main text word count:** 4743

27 **ABSTRACT**

28 *Streptococcus pneumoniae* two-component regulatory systems (TCS) enable  
29 adaptation and ensure its maintenance in host environments. This study deciphers the  
30 impact of the TCS08 on pneumococcal gene expression and its role in metabolic and  
31 pathophysiological processes. Transcriptome analysis and real-time PCR demonstrated  
32 a regulatory effect of the TCS08 on genes involved mainly in environmental information  
33 processing, intermediary metabolism, and colonization by *S. pneumoniae* D39 and  
34 TIGR4. Striking examples are genes of the fatty acid biosynthesis, arginine-deiminase  
35 system, and *psa* operon encoding the manganese ABC transport system. *In silico*  
36 analysis confirmed that TCS08 is homologous to *Staphylococcus aureus* SaeRS and a  
37 SaeR-like binding motif is displayed in the promotor region of *pavB*, the upstream gene  
38 of the *tcs08* operon encoding a surface-exposed adhesin. Indeed, PavB is regulated by  
39 the TCS08 as confirmed by immunoblotting and surface abundance assays. Similarly,  
40 Pilus-1 of TIGR4 is regulated by TCS08. Finally, *in vivo* infections using the acute  
41 pneumonia and sepsis models showed a strain dependent effect. Loss of function of  
42 HK08 or TCS08 attenuated D39 virulence in lung infections. The RR08 deficiency  
43 attenuated TIGR4 in pneumonia, while there was no effect on sepsis. In contrast, lack of  
44 HK08 procured a highly virulent TIGR4 phenotype in both pneumonia and sepsis  
45 infections. Taken together, these data indicate the importance of TCS08 in  
46 pneumococcal fitness to adapt to the milieu of the respiratory tract during colonization.

47  
48  
49  
50

51 **IMPORTANCE**

52 *Streptococcus pneumoniae* interplays with its environment by using 13 two-  
53 component regulatory systems and one orphan response regulator. These systems are  
54 involved in the sensing of environmental signals thereby modulating pneumococcal  
55 pathophysiology. This study aimed to understand the functional role of genes subject to  
56 control by the TCS08. The identified genes play a role in transport of compounds such  
57 as sugars or amino acids. In addition, the intermediary metabolism and colonization  
58 factors are modulated by TCS08. Thus, TCS08 regulates genes involved in maintaining  
59 pneumococcal physiology, transport capacity and adhesive factors to enable optimal  
60 colonization, which represents a prerequisite for invasive pneumococcal disease.

61  
62  
63  
64  
65  
66  
67  
68  
69  
70  
71  
72  
73  
74

## 75 INTRODUCTION

76 Regulatory systems are inherent features of living organisms, ensuring a rapid  
77 response and adaptation to diverse environmental conditions and acting as on/off  
78 switches for gene expression (1). Regulation in bacteria is predominantly conducted by  
79 two-component regulatory systems (TCS), quorum sensing proteins and stand-alone  
80 regulators (2-4). TCS are the most common and widespread sensing mechanisms in  
81 prokaryotes, functioning by activation of effectors through the auto-phosphorylation of a  
82 conserved histidine kinase (HK) and the phosphor-transfer to its cognate partner protein,  
83 also referred to as response regulator (RR). These systems are able to sense  
84 environmental conditions and coordinate the appropriate response to ensure survival,  
85 fitness and pathogenicity (4-9).

86 *In silico* and functional analysis of the pneumococcal genome identified thirteen  
87 cognate HK-RR pairs and an additional orphan unpaired RR in different pneumococcal  
88 strains (10, 11). TCS in pneumococci have been associated with fitness and regulation  
89 of virulence factors, and 11 TCS are reported to contribute to pneumococcal  
90 pathogenicity (11, 12). ComDE and CiaRH, both involved in the control of competence  
91 and cell survival under stress conditions, have been studied most extensively (13-18).  
92 WalRK is another well-characterized TCS in pneumococci, featuring the only PAS (Per-  
93 Arnt-Sim) domain in *S. pneumoniae* and involved in maintenance of cell wall integrity by  
94 regulating the proteins PcsB and FabT (19-21). Furthermore, this system is the only  
95 TCS which has been shown to be essential for pneumococcal viability. However, it was  
96 proven later that this effect on viability was due to the regulation of the peptidoglycan  
97 hydrolase PcsB, whose loss-of-function leads to an unstable membrane and impaired  
98 cell viability (22, 23). Pneumococcal TCS08 (in TIGR4 genes *sp\_0083* - *sp\_0084*

99 encode for RR08 and HK08) is highly homologous to the SaeRS system of  
100 *Staphylococcus aureus* (24), where it has been associated with the regulation of genes  
101 encoding  $\alpha$ -hemolysin (*hla*), coagulase (*coa*), fibronectin (Fn) binding proteins and 20  
102 other virulence factors (25-27). Interestingly, the SaeRS system of *S. aureus* has been  
103 shown to respond to sub-inhibitory concentrations of  $\alpha$ -defensins and high  
104 concentrations of H<sub>2</sub>O<sub>2</sub>, suggesting a sensing mechanism responsive to host immune  
105 system molecules and membrane alterations (26, 27). In pneumococci, a previous study  
106 on TCS08 has revealed its importance for pneumococcal virulence (11). Moreover, two  
107 reports have shown a regulatory effect of the pneumococcal TCS08 on the *rlrA*  
108 pathogenicity islet (pilus-1 or PI-1) and the cellobiose phosphotransfer system (PTS)  
109 (24, 28). Hence, the initial information available about this system suggests its  
110 involvement in pneumococcal adaptation, fitness and virulence. Nevertheless, its target  
111 genes and its precise role in pneumococcal pathogenicity are yet to be defined.

112

## 113 **RESULTS**

### 114 **Influence of TCS08 on pneumococcal growth behavior in chemically-defined** 115 **medium**

116 To investigate the effect of loss of function of TCS08 components on  
117 pneumococcal fitness, nonencapsulated *S.p.* D39 and TIGR4 parental strains and their  
118 isogenic mutants were cultured in a chemically-defined medium (CDM). All strains  
119 presented a similar growth pattern and reached similar cell densities in the stationary  
120 phase, with the exception of the TIGR4 $\Delta$ *cps* $\Delta$ *rr08* mutant (Fig. 1). A steeper logarithmic  
121 phase was detected in the *rr08* mutant in TIGR4 (Fig. 1A and 1E). Additionally, the  
122 calculated growth rates of the different mutants in both D39 and TIGR4 strains

123 suggested a significant reduction in the generation time of the *rr08* mutant in TIGR4  
124 (Fig. 1A). The observed behavior among the TCS08 mutants in the CDM used in this  
125 study may point to strain-dependent specific effects.

126

### 127 **Impact of TCS08 on TIGR4 gene expression**

128 The initial screening for the effects of TCS08 inactivation on gene expression was  
129 conducted by microarrays using RNA samples extracted from TIGR4 $\Delta$ *cps* and its  
130 isogenic *rr08*-, *hk08*-, and *tcs08*-mutants grown in CDM. Genes presenting significant  
131 changes in gene expression higher than 2-fold with known functions or with functional  
132 domains were considered for further analysis. This led to the selection of 159 protein  
133 encoding genes showing significant differences in expression compared to the wild-type  
134 in at least one of the mutants deficient in RR08, HK08 or both (TCS08). Loss of the  
135 HK08 triggered the strongest changes in expression compared to the wild-type and  
136 influenced 114 genes. Differences in expression profiles of the 159 genes found in the  
137 microarray were classified by their annotated biochemical functions in 5 different  
138 categories (Fig. 2 and Table S1): (I) the largest number of genes influenced in their  
139 expression by the TCS08 was observed for genes belonging to *environmental*  
140 *information processing (EIP)*. Genes belonging to this functional class are mostly  
141 involved in membrane transport by ABC transporters and phosphotransferase systems  
142 and represented 88 genes affected by mutations in the TCS08. The strongest changes  
143 in gene expression within the EIP category were detected for the ABC transporters *aliB*  
144 (oligopeptide substrate-binding protein) and *sp\_1434*, both in the *hk08* mutant. (II) The  
145 second most predominant category, with 41 genes, was the *intermediary metabolism*  
146 *(IM)*. Here, significant changes in the expression of genes involved in fatty acid (*fab*

147 operon), carbon (cellobiose, mannitol and maltose PTS), and amino acids (*arc* operon)  
148 metabolism were seen. Indeed, the absence of the RR08 led to a significant reduction in  
149 the expression of the *arc* operon, involved in arginine uptake and utilization. In contrast,  
150 the expression of the *arc*-genes in the strain lacking the HK08 were upregulated. These  
151 changes observed in the expression of the *arc* operon were the most prominent within  
152 the IM category. (III) Genes reported to play a role as colonization factors (CF)  
153 accounted for 13 of the 159 genes displaying expression changes in the microarray  
154 analysis. The genes found in this group encode surface-exposed proteins involved in  
155 peptidoglycan synthesis and adhesion. Among them, the gene *sp\_2136*, encoding the  
156 choline-binding protein PcpA, showed the strongest upregulation in the whole  
157 microarray analysis. The genes encoding for PavB, MucBP, PepO, PrtA and NanA  
158 displayed changes in their expression in the different *tcs08* mutants as well. These  
159 important proteins are involved in pneumococcal colonization and highlight the role of  
160 TCS08 for pneumococcal adhesion and colonization. Additionally, the lack of both  
161 components of TCS08 resulted in changes in the expression of the *rrgABC-srtC* operon,  
162 confirming the regulation of the region of diversity (RD) 4 (identified as *rlrA* or PI-1  
163 pathogenicity islet) by TCS08. It is noteworthy, that most of these genes encode  
164 surface-displayed proteins often covalently anchored in the peptidoglycan via a  
165 transpeptidase. (IV) The fourth category encompasses genes playing a role in genetic  
166 information processing (GIP), of which 9 genes were detected as significantly influenced  
167 by the TCS08. Genes like *rlrA*, *dnaK*, and *grpE*, are mostly involved in DNA and protein  
168 processing. Remarkably, in the absence of both components of the TCS08 a significant  
169 downregulation is seen for the positive regulator *rlrA*, involved in the expression of the  
170 PI-1. (V) The last category involves genes with an unknown function (UF). Here, 8

171 genes out of the 159 identified genes presented changes in their expression in the  
172 microarray, including hypothetical lipoproteins like SP\_0198 and SP\_0899 (29). These  
173 proteins contain conserved lipobox motifs and are therefore also thought to be surface-  
174 exposed and might be involved in unknown fitness related processes.

175

### 176 **TCS08 is involved in the regulation of metabolic functions of *S. pneumoniae***

177 Results obtained by the microarray screening suggested a regulatory effect of  
178 TCS08 in the expression of genes involved in the uptake and transport of essential  
179 nutrients for *S.p.* TIGR4 such as arginine and manganese (Fig. 2 and Table S1). These  
180 metabolites/ ions are transported into the cell via specific ABC transporter systems. Of  
181 particular interest is the arginine-deiminase system (ADS), which is essential for arginine  
182 uptake and utilization in pneumococci. All genes of the *arcABCdT* operon displayed  
183 important changes in their expression in the absence of the RR or the HK08.

184 Interestingly, these changes were not consistent in both mutants as the  $\Delta rr08$  strain  
185 displayed a significant downregulation of this operon while the *hk08* mutant showed an  
186 upregulation (Fig. 2 and table S1). Additionally, no significant effects were observed for  
187 the *arc* operon in the  $\Delta tcs08$  mutant. Analysis by qPCR partially confirmed the initial  
188 findings on the expression of the *arc* operon and demonstrated a strain-dependent effect  
189 for these genes. Indeed, the expression of the arginine deiminase gene *arcA* was only  
190 significantly increased in the  $\Delta rr08$  and  $\Delta hk08$  in TIGR4 (Fig. 3A), whereas no  
191 differences were found in D39 (Fig. 3B). Furthermore, the arginine-ornithine antiporter  
192 *arcD* (30, 31) presented a similar expression to *arcA* in TIGR4 and D39 TCS08 mutants,  
193 however the changes were not significant (Fig. 3). An additional key player in the



194 pneumococcal fitness is the *psa* operon. This operon plays a role in the uptake of  
195 manganese and in the response to oxidative stress in the pneumococci. The analysis by  
196 microarray showed a significant increase of 2-fold in the expression of the *psa* operon  
197 for the *hk08* mutant in the TIGR4 strain (Fig. 2 and Table S1). Conversely, no  
198 statistically important effects were observed in the *psa* operon in the *rr08* and *tcs08*  
199 mutants in the same strain (Fig. 2 and Table S1). Validation of the microarray data by  
200 qPCR discovered a significant increase in the expression of *psaA* in the *rr08* mutant of  
201 D39. Surprisingly, the microarray data for the *psa* operon could not be confirmed by  
202 qPCR in TIGR4 (Fig. 3A).

203 Immunoblot analyses of pneumococci cultured in CDM were carried out to  
204 elucidate the effect of TCS08 components on the protein levels of selected candidates  
205 from D39 and TIGR4 based on gene expression data (Fig. 4). For the ADS system, the  
206 arginine deiminase ArcA was selected as representative protein. Analysis of protein  
207 abundance of ArcA in D39 revealed a significant increase in the  $\Delta hk08$  mutant (Fig. 4B).  
208 On the contrary, the loss of the HK08 in TIGR4 resulted in a 2-fold lower abundance of  
209 ArcA (Fig. 4A). The remaining *rr08* and *tcs08* mutants in both strains showed non-  
210 significant effects in the protein levels of ArcA. Interestingly, the results obtained for the  
211 ArcA protein in the absence of the HK08 in both strains did not reflect the transcriptome  
212 (2-fold upregulation) or qPCR results. In the case of PsaA, the immunoblot analysis  
213 confirmed a significantly higher expression of 1.5-fold in the TIGR4 *hk08* (Fig. 4A),  
214 correlating with the microarray data (Fig 2).

215 In a complementary approach, the surface abundance of PsaA was examined by a  
216 flow cytometric approach (Fig. 5). For D39 a non-significant increase in the surface  
217 abundance of PsaA was measured in mutants lacking both TCS08 components. The

218 low effect of the TCS08 on PsaA observed for surface abundance correlates with the  
219 immunoblot (Fig. 4 and 5). Similarly, the increased surface abundance of PsaA in TIGR4  
220 mutants lacking the HK08 (Fig. 5) correlated with the immunoblot and microarray  
221 analysis.

222

### 223 **TCS08 regulates pneumococcal colonization factors**

224 The adhesins PavB and PI-1 were shown to be regulated in the TIGR4 strain by  
225 our initial microarray analysis (Fig. 2 and Table S1) and confirmed by qPCR.

226 Interestingly, *pavB* is a gene upstream of the 5' region of the *tcs08* operon presenting  
227 properties of a sortase-anchored adhesin. PavB has been shown to interact with various  
228 extracellular matrix proteins and probably also directly with a cellular receptor (32, 33),  
229 thereby linking pneumococci with host cells. Similarly, the PI-1 is composed of the  
230 proteins RrgA, RrgB, and RrgC, with RrgB functioning as the backbone (34). The genes  
231 of the *pilus-1* are part of the RD4 or *rtrA* pathogenicity island and belong to the  
232 accessory genome of some pneumococcal strains and clinical isolates, including TIGR4  
233 (35, 36). Both PI-1 and *pavB* genes presented significant changes in gene expression  
234 with an upregulation in mutants lacking the HK08 by at least 2-fold (Fig. 3). Moreover,  
235 the absence of both components of the TCS08 leads to a significantly reduced  
236 expression the *pilus-1* in TIGR4. While, no significant effect was seen for *pavB* in either  
237 the *rr08* or *tcs08* mutant in neither D39 or TIGR4 strains at the gene expression level.

238 On the protein level, quantifications were performed by immunoblotting (Fig. 4) and  
239 the levels of surface abundance were evaluated by flow-cytometry (Fig. 5). For PI-1, the  
240 backbone protein RrgB was used as representative. Immunoblot analysis and flow-  
241 cytometry indicated higher protein levels and surface abundance, respectively, in

242 mutants lacking HK08 and RR08. These results are in line with gene expression  
243 analyses. Importantly, the lower protein levels of RrgB in the absence of both TCS08  
244 components correlated with the downregulation measured by qPCR and transcriptomics  
245 (Fig. 4A and 5A). For PavB, immunoblots revealed a high impact on PavB amounts in  
246 the different mutants with a 2-fold increase in the absence of HK08 in D39 and even 10-  
247 fold in TIGR4. In contrast, the lack of either the RR08 or both components of the TCS08  
248 procured a 2-fold decrease of PavB in both D39 and TIGR4 (Fig. 4). Similar, the surface  
249 abundance of PavB was higher in the *hk08*-mutant and lower in the *rr08*- and *tcs08*-  
250 mutants as indicated by flow cytometry (Fig. 5). Importantly, these data fit with the gene  
251 expression analysis of the mutants by microarrays.

252 Furthermore, an *in silico* comparison of a 300 bp upstream region of the  
253 pneumococcal gene *pavB* and the staphylococcal *saeP* and *fnbA* genes revealed the  
254 presence of a SaeR-like binding motif for *pavB* (Fig. 6). The SaeR-like binding motif is  
255 76 bp upstream of the starting ATG of *pavB* and within its putative promotor region. In  
256 conclusion, TCS08 interferes with the regulation of adhesins and may therefore also  
257 have an impact on colonization.

258

### 259 **TCS08 modulation of lung infections and sepsis is strain-dependent**

260 To assess the impact of the TCS08 or its individual components on pneumococcal  
261 colonization, lung infection or sepsis, CD-1 mice were intranasally or intraperitoneally  
262 infected with bioluminescent wild-type strains (D39 or TIGR4) and corresponding  
263 isogenic mutants. In D39, intranasal infections with mutants lacking either the HK08 or  
264 both components of the TCS08 increased the survival time of mice, thus the mutants  
265 were attenuated and represent a less virulent phenotype (Fig. 7B and F). The *rr08*-

266 mutant of D39 showed no differences in developing lung infections (Fig. 7B and F). In  
267 the sepsis model no differences between the wild-type of D39 and its isogenic mutants  
268 were observed (Fig. 7H). Strikingly and in contrast to D39 infections, the acute  
269 pneumonia and sepsis infection models indicated a higher virulence potential of TIGR4  
270 bacteria lacking the HK08. On the contrary, the loss of the RR08 in the TIGR4 genetic  
271 background resulted in a significantly attenuated phenotype, leading to the survival of  
272 50% of the infected mice. No differences were observed when both components of the  
273 TCS08 were absent in TIGR4 (Fig. 7A, E and G).

274 The impact of the TCS08 on colonization and lung infection was further  
275 investigated in the competitive mouse infection assay using the intranasal infection  
276 route. Interestingly, the wild-type TIGR4 has a lower number of recovered bacteria  
277 compared to the *rr08*-mutant, while having a significantly higher number in the  
278 nasopharynx or bronchoalveolar lavage compared to the *hk08*-mutant 24 and 48 hours  
279 post-infection (Fig. S2). Taken together, it becomes clear that the TCS08 and its  
280 individual components are essential for a balanced homeostasis, thereby maintaining  
281 pneumococcal fitness and robustness.

282

## 283 **DISCUSSION**

284 The role of a subset of pneumococcal TCS in competence, physiology, and  
285 virulence has been characterized providing an initial understanding of their specific  
286 regulons (10, 12, 37). As such, TCS08 of *S. pneumoniae* has been initially identified and  
287 suggested to be important for virulence (11, 12, 37). Nevertheless, the mechanism  
288 underlying its effect on pathophysiological processes has not been elucidated before. A  
289 valid approach to estimate the regulons and effects of a TCS is to analyze the protein

290 structures of its components. Unfortunately, only the structure of the pneumococcal  
291 RR11 and RR14 have been solved experimentally (38, 39). Nevertheless, it is possible  
292 to estimate the likely structural disposition of the remaining components by using  
293 bioinformatic tools. As such, according to the information obtained by the database  
294 SMART (Simpler Modular Architecture Research Tool, <http://smart.embl-heidelberg.de/>),  
295 the pneumococcal histidine kinase 08 can be classified as an intermembrane histidine  
296 kinase (IM-HK) due to its short extracellular loop. Members of this class of HK are  
297 known to respond to membrane disturbances (26). Additionally, the RR08 is classified  
298 as member of the OmpR class of response regulators, known to bind to short tandem  
299 repeats of DNA (40). Both components share a high homology and similar sequence  
300 features with the HK SaeS and RR SaeR from *S. aureus* (Fig S4) (24). Altogether, it is  
301 plausible to hypothesize that the regulatory behavior of the pneumococcal TCS08 is  
302 similar to the global virulence regulatory system SaeRS of *Staphylococcus aureus*.

303         The staphylococcal SaeRS TCS is known to be essential for the virulence of  
304 *S. aureus* by regulating approximately 20 virulence genes such as the  $\alpha$ -hemolysin (*hla*),  
305 fibronectin binding protein A (*fbnA*), and its own SaePQRS operon, among others (27).  
306 However, there are only a few reports regarding the control of staphylococcal fitness by  
307 the SaeRS system. One study investigated a negative regulatory effect of fatty acids on  
308 the phosphorylation of SaeS and the activation of the virulence factors controlled by  
309 SaeR (41). Our initial approach to investigate the regulatory roles of the pneumococcal  
310 TCS08 by transcriptomics discovered five main gene categories influenced by this TCS.  
311 Interestingly, we observed the most predominant regulation for genes participating in  
312 environmental information processing and intermediary metabolism (Fig. 2 and table  
313 S1). The genes grouped in these two categories are annotated as part of ABC

314 transporters, phosphotransferase systems, and lipid biosynthesis and were found to be  
315 localized all along the pneumococcal genome (Fig. S3). The genes found to be  
316 regulated by TCS08 share an important feature, namely their localization and/or activity  
317 in the pneumococcal membrane. Additionally, several of the different PTS and ABC  
318 transporters regulated by TCS08 are involved in fitness and virulence of this pathogen.  
319 Hence, the effect of the TCS08 is more pronounced in the colonization phase of the  
320 pneumococcal life cycle. This is for example the case for the neuraminidase NanA,  
321 lipoprotein PsaA, and arginine deiminase system (ADS) (31, 42-44). Moreover, the  
322 observed regulation of the complete *fab* operon encoding enzymes for the fatty acid  
323 biosynthesis creates an important connection between the TCS08 and the sensing and  
324 responding to membrane instability (19, 45). The transporter systems affected by TCS08  
325 are mostly essential during colonization under nutrient limiting conditions, but also in the  
326 initial stages of the diseases to take up nutrients and ensure pneumococcal fitness (Fig.  
327 2 and 3) (46, 47).

328         In addition to the gene expression analysis of *tcs08*-mutants we further  
329 investigated the changes on the protein level for selected candidate proteins. Our  
330 immunoblot analyses demonstrated differences for PsaA and the arginine deiminase  
331 ArcA. Remarkably, compared to the respective wild-type strains ArcA occurred at higher  
332 protein levels in all mutants of D39 and the TIGR4 mutant lacking both the HK08 and  
333 RR08 (2-fold), while ArcA had lower protein levels in the TIGR4 mutants lacking either  
334 HK08 or RR08 (2-fold). However, only the opposite effect of deletion of *hk08* on the  
335 ArcA level was statistically significant. This is a further proof that the ADS in D39 and  
336 TIGR4 is differentially regulated as has been shown before for the stand-alone regulator

337 ArgR2. There, the *arc* operon showed a constitutive expression in D39, while in TIGR4  
338 gene expression was upregulated by ArgR2 (31).

339 It is essential that pneumococci activate their metabolic inventory when colonizing  
340 their host to ensure adaptation and fitness. As such, our results point to a role of TCS08  
341 in the fine tuning of colonization and metabolic homeostasis as exemplified by the level  
342 of change in the expression of *pavB*, and the genes of the *pilus-1*, *fab*, and *arc* operons.

343 *PavB* belongs to a group of genes regulated by the TCS08 which are strongly  
344 involved in colonization by its interactions with host proteins (32, 33). These group of  
345 genes encode mostly for surface-exposed proteins associated to peptidoglycan  
346 metabolism and adherence to host cells. These genes are found grouped clockwise  
347 mostly in the first quarter of the pneumococcal genome, and transcription and replication  
348 proceed into the same direction (Fig. S3). Interestingly, the regulation of the adhesins  
349 PI-1 and PavB proteins by the pneumococcal TCS08 illustrates the high homology  
350 between the staphylococcal SaeRS and pneumococcal TCS08. Differences in gene  
351 expression of the PI-1 component genes was detected by microarray analysis (Fig. 2)  
352 and qPCR (Fig. 3) in the TIGR4 TCS08 mutants. Similarly, protein levels were also  
353 affected in the TCS08 mutants, especially in the absence of both components of the  
354 TCS08, in which a strong downregulation was detected (Fig. 4A and 5A). Our findings  
355 correlate to some extent to a previous study showing the regulation of the PI-1 by the  
356 pneumococcal TCS08 (28). For the adhesin PavB, inconsistent results were obtained for  
357 gene expression and protein abundance in the D39 strain. A minor but significant  
358 differential *pavB* gene expression was measured by microarray analysis and qPCR for  
359 TIGR4 (Fig. 2 and 3). In contrast, PavB protein levels were significantly affected in all  
360 mutants, with a 2-fold increase in the absence of the HK08 and a decrease in PavB in

361 mutants lacking either the RR08 or both components of the TCS08 as shown by  
362 immunoblot and flow-cytometry (Fig. 4 and 5).

363 The staphylococcal fibronectin binding protein FbnA is weakly regulated by the  
364 SaeRS system of *S. aureus* (48), which in pneumococci correlates with the link found  
365 between TCS08 and PavB/PI-1. A direct repeat sequence (TTTAAN<sub>7</sub>TTTAA), similar to  
366 the imperfect SaeR binding site (GTTAAN<sub>6</sub>TTTAA) (49), can be found directly upstream  
367 of *pavB* (Fig. 6) suggesting that the RR08 binds directly to the *pavB* promoter region. A  
368 strong hint for the *pavB* gene regulation by the TCS08 is the higher abundance of PavB  
369 in the absence of the HK08. Surprisingly, a conserved repeat sequence  
370 TTTAAN<sub>14</sub>GTAA was found close to the *rIrA* operon and could indicate an indirect  
371 effect of the TCS08 in the regulation of the *pilus-1* via its positive regulator RIrA (Table  
372 S5). The *in silico* search for SaeR-like binding motifs among different TCS08 regulated  
373 genes indicated the presence of a variation of this binding sequence for the *cellobiose*  
374 and *arc* operons, while it was absent for the *psa* operon (Table S5). All of the genes  
375 encoded in these operons have been reported to be under the regulation of CcpA-  
376 dependent stand-alone regulators (31, 50-52). Additionally, the *psa* operon has been  
377 also shown to be under the regulation of the PsaR and TCS04 (PnpRS), which might be  
378 interplaying with the TCS08 (53, 54). This suggests either a cooperative role or a  
379 collateral effect of TCS08 and we hypothesize that the TCS08 acts as a membrane  
380 stability sensor system.

381 The staphylococcal SaeRS was further reported to regulate proteases and being  
382 involved in biofilm formation. Our microarray analysis showed an effect on the  
383 expression for genes encoding a putative protease domain (Fig. 2 and 3) such as the  
384 gene (*sp\_0144*) possessing an Abi (abortive infective domain) with unknown function in



385 pneumococci. Bioinformatic analysis revealed that the pneumococcal *sp\_0144* is highly  
386 homologous to *spdABC* genes of *S. aureus* Newman, featuring an Abi domain.  
387 Interestingly, the SpdA, SpdB, and SpdC proteins have been reported to be involved in  
388 the deposition and surface abundance of sortase-anchored proteins in *S. aureus* (55).  
389 The gene expression of *sp\_0144* (TIGR4) presented an upregulation in the hk08 mutant  
390 in TIGR4. It cannot be ruled out that the changes in SP\_0144 also contribute to the  
391 protein abundance demonstrated for PavB or PI-1 when the strains lack components of  
392 the TCS08 (Fig. 3). In turn, changes in surface abundance of colonization factors will  
393 interfere with the pneumococcal virulence and /or immune evasion. However, this  
394 hypothesis was not evaluated in this study and needs experimental proof in a follow up  
395 study.

396 Nasopharyngeal colonization by pneumococci requires adherence to host cells and  
397 generates a foothold in the human host. Hence, the regulation of adhesins and ECM  
398 binding proteins like PavB or PI-1 represents a successful strategy of the pathogen to  
399 adapt to this host compartment. Similar, the sensing of human neutrophil peptides and  
400 membrane disruption molecules is also essential to ensure a successful colonization  
401 and immune escape phenotype. Our *in vivo* studies using pneumonia and sepsis murine  
402 models confirmed the contribution of the pneumococcal TCS08 in colonization but also  
403 virulence (Fig. 7). However, the effect is strain dependent, highlighting the role and  
404 network of different stand-alone regulators and other regulatory systems of  
405 pneumococci on the overall regulation of pneumococcal fitness and pathophysiology.  
406 Such strain-dependent effects have been also shown for additional pneumococcal TCS  
407 such as PnpRS and TCS09 (ZmpRS) (53, 56). Remarkably, a more virulent phenotype  
408 was observed for the TIGR4 mutant lacking the HK08, while the TIGR4 deficient for the

409 RR08 displayed a decrease in virulence in the pneumonia model (Fig. 7A). In D39, the  
410 opposite effect with a slight increase in survival was observed in the absence of the  
411 HK08 in the same infection model (Fig. 7B). Additionally, the loss of function of both  
412 TCS08 components in strain D39 resulted in a significant reduction in virulence in the  
413 pneumonia model (Fig. 7B). Strikingly, this D39 attenuation was not observed in the  
414 sepsis model. Similar, the TIGR4 *rr08* mutant was also as virulent as the wild-type,  
415 despite being attenuated in the pneumonia model (Fig. 7G and 7H). In contrast, the  
416 TIGR4 $\Delta$ *hk08* mutant was significantly more virulent than the wild-type in the sepsis  
417 model (Fig. 7 G). As such, our results suggest that the TCS08 is mostly involved in  
418 bacterial fitness and regulation of adhesins required for a successful colonization. Such  
419 striking difference between two representative pneumococcal strains may reflect their  
420 different genomic background and the overall versatility of pneumococci.

421 Interesting pathophenotypes were observed in competitive mouse infections, i.e.  
422 coinfections of the TIGR4 wild-type and its *tcs08* isogenic mutants (Fig. S2). While the  
423 pneumonia model showed an avirulent phenotype in the absence of the RR08, this  
424 mutant revealed a higher competitive index when compared to its wild-type in the  
425 coinfection assay in both, the nasopharyngeal and bronchoalveolar lavages, indicating  
426 lower numbers of the wild-type in these host compartments. In addition, TIGR4 mutants  
427 lacking either the HK08 and or both components of the TCS08 were apparently  
428 outcompeted by the wild-type (Fig. S2) despite being more virulent than the wild-type as  
429 indicated in the acute pneumonia model. A plausible explanation for this phenomenon  
430 might be that the TIGR4 mutant lacking the HK08 is rapidly progressing from the  
431 nasopharynx and lungs into the blood, and hence, low numbers are present in the  
432 nasopharynx and lavage. Similar, the absence of the RR08 impairs progressing into the

433 blood and thus, higher numbers of the *rr08*-mutant are found in the nasopharynx.  
434 Indeed, this pneumococcal behavior post-nasopharyngeal infection can also be  
435 visualized in the bioluminescent images of the acute pneumonia model, in which the  
436 mice infected with the strain lacking the HK08 rapidly developed pneumonia and sepsis  
437 (Fig. 7A).

438 It is also important to mention here the mild impact of TCS08 on gene expression  
439 alterations. This suggests a role for the TCS08 as a fine tuning and signal modulation  
440 system, which is dependent on additional regulators. This hypothesis is supported by  
441 the altered gene expression of other TCS such as CiaRH and ComDE (Fig. 2 and Table  
442 S1). Such low impact on gene expression might also facilitate an explanation on the  
443 predominant role of the HK08 in controlling gene expression in pneumococci. A similar  
444 regulatory strategy has been reported for CiaRH. This system is able to control directly  
445 the expression of the protease HtrA and specific small RNAs, which in turn modulate  
446 indirectly the activity of ComDE and additional regulators (57, 58). We therefore  
447 hypothesize that the stimulus received by HK08 modulates the activity of RR08 and  
448 probably other regulators. In *Staphylococcus aureus*, the SaeRS system is also  
449 dependent on additional auxiliary proteins SaePQ (59). These proteins have been  
450 reported to interact with SaeS in order to control its phosphorylation state (59). Such  
451 systems have not yet been detected for the homologous TCS08 of the pneumococci.  
452 However, a more thorough biochemically analysis would be needed to generate a  
453 comprehensive regulatory map within pneumococcal regulators.

454 In conclusion, this study identified five main groups of genes influenced by the  
455 pneumococcal TCS08 in a strain-specific manner. A high number of these genes  
456 encode proteins involved in environmental signal processing, intermediary metabolism,

457 colonization or genetic information processing. Furthermore, most of the TCS08-  
458 regulated proteins are membrane-bound and involved in nutrient transport as well as  
459 fatty acid biosynthesis. Additionally, surface-exposed PavB and PI-1 islet proteins  
460 involved in adhesion to host components were confirmed to be controlled by the TCS08.  
461 Thus, the HK08 of the TCS08 is probably sensing small molecules entering the  
462 membrane compartment of pneumococci and adapts thereby the pneumococcus to the  
463 specific environmental conditions during colonization.

464

## 465 **MATERIALS AND METHODS**

### 466 **Bacterial strains growth conditions**

467 *S. pneumoniae* and *E. coli* strains used in this study are listed in Table S2.

468 Pneumococcal wild-type and isogenic *tcs08* deletion mutants were grown on Columbia  
469 blood agar plates (Oxoid) containing selection antibiotics (kanamycin 50 µg/ml and  
470 erythromycin 5 µg/ml or spectinomycin 100 µg/ml) using an incubator at 37°C, 5% CO<sub>2</sub>.

471 In liquid cultures, pneumococci were cultivated in Todd-Hewitt-broth (Roth)  
472 supplemented with 0.5% yeast extract or chemically defined medium (CDM: RPMI1640  
473 + 2mM L-glutamine medium HyClone™ GE Healthcare life sciences supplemented with  
474 30.5 mM glucose, 0.65 mM uracil, 0.27 mM adenine, 1.1 mM glycine, 0.24 mM choline  
475 chloride, 1.7 mM NaH<sub>2</sub>PO<sub>4</sub> x H<sub>2</sub>O, 3.8 mM Na<sub>2</sub>HPO<sub>4</sub> , and 27 mM NaHCO<sub>3</sub>) using a  
476 water bath at 37°C. Recombinant *E. coli* strains were inoculated on Lysogeny Broth (LB)  
477 medium (Roth) in the presence of kanamycin (km, 50 µg/ml) at 37°C using an orbital  
478 shaker.

479

480

## 481 **Molecular techniques**

482 The oligonucleotides and plasmid constructs used in this study are depicted in  
483 Table S3 and Table S4. The isolation of pneumococcal chromosomal DNA was  
484 achieved by using the standard phenol-chloroform extraction protocol. Briefly,  
485 *S. pneumoniae* strains were cultured in blood agar for 6 hours, transferred to new blood  
486 agar plates with antibiotics and grown for 10 hours at 37°C and 5% CO<sub>2</sub>. After  
487 inoculation in THY liquid medium and culture until an OD<sub>600nm</sub> of 0.6 in a water bath at  
488 37°C, the bacteria were harvested by centrifugation. The supernatant was discarded  
489 and the bacterial pellet was resuspended in TES buffer for lysis and processing. Finally,  
490 the DNA was extracted using phenol and Phenol:Chloroform:Isoamyl Alcohol (25:24:1),  
491 washed with 96% Ethanol and stored in Tris-EDTA (TE) buffer at -20°C for further use.  
492 The DNA regions needed for mutant generation and for protein production were  
493 amplified by PCR using the *pfu* proofreading polymerase (Stratagene, LaJolla, USA)  
494 and specific primers (Eurofins MWG Operon Germany) according to the manufacturer's  
495 instructions. The annealing and extension temperatures were defined by the primers  
496 and length of the DNA inserts, respectively. The PCR products and the plasmids were  
497 purified using the Wizard® SV Gel and PCR clean-up System (Promega GmbH, USA).  
498 The final constructs were confirmed by sequencing (Eurofins MWG).

499

## 500 ***S. pneumoniae* mutant generation**

501 For mutant generation in D39 and TIGR4 ( $\Delta cps$  and bioluminescent (*lux*) strains),  
502 the insertion-deletion strategy was applied by amplifying 5' and 3' flanking regions of  
503 *rr08*, *hk08* and the full *rr08-hk08* operon via PCR with specific primers. The genomic  
504 fragments were cloned in a pGEM-t easy vector and transformed into *E. coli* DH5 $\alpha$  and

505 further processed by inverse PCR using primers to delete the desired target gene and  
506 replacing it with either spectinomycin (*aad9*) or erythromycin (*erm<sup>R</sup>*) resistance gene  
507 cassettes. To achieve the deletion of the desired regions, the inverse PCR products and  
508 antibiotic cassettes were digested using specific restriction enzymes (Table S3). Finally,  
509 the deleted gene fragments encompass the following regions in each mutant:  $\Delta hk08$  (bp  
510 29 to 953),  $\Delta rr08$  (bp 100 to 644) and  $\Delta tcs08$  (bp 128 of *rr08* to bp 348 of *hk08*).

511 Pneumococcal strains were transformed as described previously (Hammerschmidt et al.,  
512 2007 and Schulz et al., 2014) using competence-stimulating peptide (CSP) 1 (D39) or 2  
513 (TIGR4) and cultivated in the presence of the appropriate antibiotics: kanamycin (50  
514  $\mu\text{g/ml}$ ) and erythromycin (5  $\mu\text{g/ml}$ ) or spectinomycin (10  $\mu\text{g/ml}$ ). Briefly, *S. pneumoniae*  
515 strains were cultured on blood agar plates for 8 hours and a second passage was done  
516 for 10 hours in an incubator at 37°C and 5% CO<sub>2</sub>. Later, the strains were inoculated in  
517 THY with an initial OD<sub>600nm</sub> of 0.05 and grown in a water bath until a final OD<sub>600nm</sub> of 0.1.  
518 The corresponding CSP was added and incubated at 37°C for 15 minutes, followed by  
519 the addition of the plasmid for transformation and a heat shock treatment of 10 minutes  
520 on ice and 30 minutes at 30°C, bacteria were allowed to grow for 2 hours at 37°C and  
521 plated on blood agar plates with the corresponding antibiotics. The resulting *S.*

522 *pneumoniae* D39 and TIGR4 *tcs08*-deficient mutants were screened by colony PCR and  
523 real-time PCR (qPCR) (Fig. S1B). Stocks were generated in THY supplemented with  
524 20% glycerol and stored at -80°C. Individual mutants for *rr08* (*sp\_0083*) and *hk08*  
525 (*sp\_0084*) as well as a  $\Delta tcs08$  (*sp\_0083+sp\_0084*) mutant were confirmed by colony  
526 PCR.

527

528

## 529 **Transcription analysis by microarrays**

530 For the analysis of the gene expression by microarray, TIGR4 $\Delta$ *cps* and its isogenic  
531 *rr*, *hk* and *tcs08* mutants were grown in CDM until an OD<sub>600nm</sub> of 0.35-0.4 in triplicate.  
532 Bacterial cultures were then added to previously prepared tubes containing frozen killing  
533 buffer (20mM Tris-HCL (pH 7.5), 5mM MgCl<sub>2</sub>, 20mM NaN<sub>3</sub>) and centrifuged for 5  
534 minutes at 10,000 g. The supernatant was completely removed and the tubes containing  
535 the pellets were immediately flash frozen in liquid nitrogen and stored at -80°C until the  
536 next step. The pellets were processed for total RNA extraction using acid phenol-  
537 chloroform and DNase treatment to remove genomic DNA. The products were purified  
538 using the RNA Clean-Up and Concentration kit (NORGEN BIOTEK CORP), the quality  
539 of the RNA was determined by Agilent 2100 Bioanalyzer and the amount was quantified  
540 using a NanoDrop ND-1000 (PeqLab). 5 µg of total RNA were subjected to cDNA  
541 synthesis as described by Winter et al., (2011) (60). 100 ng of Cy3-labeled cDNA were  
542 hybridized to the microarray following Agilent's hybridization, washing and scanning  
543 protocol (One-Color Microarray-based Gene Expression Analysis, version 6.9.1). Data  
544 were extracted and processed using the Feature Extraction software (version 11.5.1.1).  
545 Further data analysis was performed using the GeneSpring software (version 14.8). A  
546 Student's t-test with  $p < 0.05$ , followed by a Benjamini and Hochberg false discovery  
547 rate correction with  $q < 0.05$  were performed for the analysis.

548

## 549 **Gene expression analysis by qPCR**

550 D39 and TIGR4 $\Delta$ *cps* strains and their corresponding *tcs08* mutants were grown in  
551 triplicate in CDM until early-log phase and harvested for RNA isolation using the EURx  
552 GeneMatrix UNIVERSAL RNA purification kit (ROBOKLON). The RNA was checked for

553 quality and contamination by PCR and agarose gel electrophoresis. Next, cDNA  
554 synthesis was carried out using the Superscript III reverse transcriptase (Thermofisher)  
555 and random Hexamer primers (BioRad). The obtained cDNA was checked by PCR  
556 using the same specific primers designed for the qPCR studies (Table S3). The cDNA  
557 was measured by nanodrop and stored at -20°C until further tests. For the qPCR  
558 experiments, a StepOnePlus thermocycler (Applied Biosystems) with a Syber Green  
559 master mix (BioRad) were used following the instructions for relative quantification to  
560 determine the efficiency of the primers, and as such, a reference curve was designed to  
561 be run for every gene with 5 points and concentrations ranging from 100 ng/μl to 0.01  
562 ng/μl with 1:10 dilution steps. The StepOne software (version 2.3, Life technologies) and  
563 Microsoft® Office® Excel 2016 software (Microsoft) were used for the analysis. The final  
564 results are plotted as the  $\Delta\Delta CT$  ( $\log_2$  of the fold change of expression), with the wild-  
565 type set to 0 and compared versus its respective *tcs08* mutants. For normalization, the  
566 gene encoding the ribosomal protein S16 (*sp\_0775*) was used. The results are plotted  
567 as box whiskers showing the median and 95% confidence intervals and as a heatmap.  
568

### 569 **Protein expression by immunoblot**

570 *S. pneumoniae* D39 and TIGR4 strains and its isogenic mutants were grown in  
571 CDM, harvested at middle-log phase and re-suspended in phosphate buffered saline  
572 buffer (PBS). A total of  $2 \times 10^8$  cells were loaded and run on a 12% SDS-PAGE and  
573 further transferred into a nitrocellulose membrane. Mouse polyclonal antibodies  
574 generated against different pneumococcal proteins and a secondary fluorescence  
575 labeled IRDye® 800CW Goat  $\alpha$ -mouse IgG antibody (1:15000) were used to detect their  
576 expression in the WT and its isogenic mutants using the Odyssey® CLx Scanner (LI-



577 COR). Rabbit polyclonal antibody against Enolase (1:25000) and fluorescence labeled  
578 IRDye® 680RD Goat  $\alpha$ -rabbit IgG antibody (1:15000) were used as loading control for  
579 normalization. The quantification was performed using the Image Studio software™ (LI-  
580 COR) and the data are presented as the  $\log_2$  of the fold change with the wild-type set to  
581 0 and compared versus each mutant after normalization against Enolase. The Student's  
582 t-test was used for the statistical analysis.

583

### 584 **Surface abundance of proteins analyzed by flow-cytometry**

585 The expression and abundance of different surface proteins was analyzed by flow-  
586 cytometry. To detect the antigens specific primary antibodies were used in conjunction  
587 with fluorescence tagged secondary antibodies. In brief, non-encapsulated bacteria  
588 (D39 $\Delta$ *cps* and TIGR4 $\Delta$ *cps*) and the isogenic *tcs08*-mutants were used after growth in  
589 CDM until a final OD 0.35-0.4. Bacteria were washed with 5 ml PBS and finally  
590 resuspended in 1 ml PBS supplemented with 0,5% FCS. The bacterial cell density was  
591 adjusted to  $1 \times 10^7$  cells/ml in 1 ml of PBS/0.5% FCS/1% PFA, loaded into a 96-microtiter  
592 plate (U-bottom) and incubated for 1 hour at 4°C. The plates were centrifuged at 3200 g  
593 for 6 minutes, the supernatant removed and bacteria were incubated for 45 minutes at  
594 4°C with antigen specific mouse antibodies (31, 32, 61). Samples were washed twice  
595 with PBS/0.5% FCS and incubated with the goat  $\alpha$ -mouse Alexa 488 (1/1000 dilution)  
596 antibody for 45 minutes. Thereafter, the plate was washed twice with PBS/0,5% FCS  
597 and fixed using 1% PFA in the dark at 4°C o/n. Fluorescence of the bacteria was  
598 measured using a BD FACSCalibur™ machine equipped with a log forward and log side  
599 scatter plots. The measurement of the data was conducted with the CellQuestPro  
600 Software 6.0. (BD Biosciences) collecting 50.000 events and a gated region. The results

601 were analyzed using the freeware Flowing Software version 2.5.1 (Turku Centre for  
602 Biotechnology, University of Turku-Finland) and presented as the geometric mean  
603 fluorescence intensity (GMFI) of the analyzed bacteria population by the percentage of  
604 labeled bacteria.

605

### 606 **Impact of TCS08 in a murine pneumonia and sepsis models**

607 Bioluminescent expressing *S. pneumoniae* D39*lux* or TIGR4*lux* and their isogenic  
608 mutants were grown in THY supplemented with 10% heat-inactivated fetal calf serum  
609 (FCS) until an OD<sub>600nm</sub> of 0.35-0.4 and harvested via centrifugation at 3270 g for 6 min.  
610 The bacteria were resuspended in PBS and the colony forming units were adjusted for  
611 an infection dose of  $1 \times 10^7$  colony forming units (cfu) in 10µl or  $5 \times 10^3$  cfu in 200 µl per  
612 mice for the pneumonia and sepsis model, respectively. The infection process for  
613 pneumonia was carried out as follows: 8-10 weeks old 10-12 CD-1® outbred mice  
614 were arranged in groups of 5 or 4 animals per cage, respectively, and anesthetized with  
615 an intraperitoneal injection of 200 µl of Ketamin 10% (mg/ml) and 2% Rompun (dose is  
616 determined accordingly to the weight of the animals). The mice were held facing upward  
617 and 20 µl of infection dose (10 µl bacteria + 10 µl hyaluronidase (90U)) were pipetted  
618 carefully in the nostrils. Mice were allowed to inhale the drops and rest facing upwards  
619 until the anesthesia wore off. The infection dose was controlled by plating in triplicate  
620 dilutions of the bacterial solution on blood agar plates and counting the colonies. The  
621 infection was followed in real-time using the IVIS® spectrum system and imaging  
622 software. Mice were controlled after the first 24 hours and every 8 hours from then on  
623 until the end of the experiment. For the sepsis model: 8-10 weeks old CD-1® outbred  
624 mice (n=8) were arranged in groups of 4 animals per cage and intraperitoneally infected

625 with 200  $\mu$ l containing  $5 \times 10^3$  cfu. Mice were controlled 16 hours post-infection and  
626 every 8 hours from then on until the end of the experiment. The infection dose was  
627 confirmed by plating different dilutions of the infection dose. The results were annotated  
628 using the GraphPad prism version 7.02 software and presented in a Kaplan-Meier (KM)  
629 graph. The log-rank test was used for the statistics.

630 Bioluminescent TIGR4 wild-type and its corresponding *tcs08*-mutants were applied  
631 in the coinfection assay. Briefly, an infection dose of  $2.5 \times 10^7$  cfu of wild-type and a  
632 single mutant ( $\Delta$ *rr08*,  $\Delta$ *hk08* or  $\Delta$ *tcs08*) were mixed (1:1 ratio) and mice (n=10 CD-1)  
633 were intranasally infected. The infection dose was determined by plating serial dilutions  
634 of the infection mixture onto plates with the kanamycin or kanamycin plus  
635 erythromycin/spec to enumerate cfu of wild-type and mutant or cfu of the mutant. Mice  
636 were sacrificed after 24 and 48 hours and nasopharyngeal and bronchoalveolar lavages  
637 were performed using a tracheal cannula filled with 1ml of sterile PBS. The recovered  
638 solution was diluted and plated on blood agar plates with appropriate antibiotics (see  
639 above). Colonies were counted and recovered cfu of the wild-type and mutant  
640 determined. The competitive index (CI) was calculated as the mutant/wild-type ratio.  
641 Values higher than 1 indicates a higher ratio of mutant bacteria, while values below 1  
642 indicates a higher ratio of wild-type bacteria. The results were annotated using the  
643 GraphPad prism version 7.02 software and presented as scatter plots where every dot  
644 indicates 1 mouse.

645

646

647

648

649 **ETHIC STATEMENT**

650 All animal experiments were conducted according to the German regulations of the  
651 Society for Laboratory Animal Science (GV-SOLAS) and the European Health Law of  
652 the Federation of Laboratory Animal Science Associations (FELASA). All experiments  
653 were approved by the Landesamt für Landwirtschaft, Lebensmittelsicherheit und  
654 Fischerei, Mecklenburg – Vorpommern (LALLFV M-V, Rostock, Germany, permit no.  
655 7221.3-1-056/16).

656

657 **ACCESSION NUMBER**

658 Data obtained from the microarrays analysis have been uploaded to the National  
659 Center for Biotechnology Information (NCBI) at the Gene Expression Omnibus (GEO)  
660 ArrayExpress databases at: <https://www.ncbi.nlm.nih.gov/geo/> under accession number  
661 GSE108874.

662

663 **SUPPORTING INFORMATION**

664 The supplementary information presented here includes four (5) Tables and four  
665 (4) Figures. Table S1 (results of the microarray analysis), Table S2 (list of strains and  
666 mutants), Table S3 (list of primers), Table S4 (list of plasmids) and Table S5 (*in silico*  
667 search for RR08 binding motifs). Figure S1 depicts the genomic organization and  
668 mutagenesis strategy used in this study, as well as the confirmation of the different  
669 mutants by qPCR. Figure S2 presents the competitive index obtained from the  
670 coinfection assays with the TIGR4 wildtype and its isogenic *tcs08*-mutants. Figure S3  
671 illustrates the linear localization, orientation and category of the 159 genes obtained by

672 the microarray study. Figure S4 illustrates the protein alignment of *S. aureus* SaeRS and  
673 pneumococcal TCS08.

674

## 675 **FUNDING INFORMATION**

676 This work was supported by a grant from the Deutsche Forschungsgemeinschaft  
677 (DFG GRK 1870; Bacterial Respiratory Infections) in Germany, and by the Committee  
678 for Development of Research at the University of Antioquia (CODI, CIEMB-097-13) in  
679 Colombia.

680

## 681 **ACKNOWLEDGMENTS**

682 We would like to acknowledge the technical work performed by Kristine Sievert-  
683 Giermann, Birgit Rietow and Gerhard Burchhardt in this study.

684

## 685 **AUTHORS CONTRIBUTIONS**

686 Conceived and designed the experiments: AGM, GG, and SHA. Performed the  
687 experiments: AGM, GG, SHI, HR, UM, FV, LP, SB, NK, VK. Analyzed the data: AGM,  
688 GG, HR, UM and SHA. Writing of the manuscript: AGM, GG and SHA. Revision of the  
689 manuscript: AGM, GG, HR, UM, RB, UV and SHA.

690

691

692

693

694

## 695 REFERENCES

- 696 1. Balleza E, Lopez-Bojorquez LN, Martinez-Antonio A, Resendis-Antonio O, Lozada-Chavez I,  
697 Balderas-Martinez YI, Encarnacion S, Collado-Vides J. 2009. Regulation by transcription factors in  
698 bacteria: beyond description. *FEMS Microbiol Rev* 33:133-51.
- 699 2. Stock AM, Robinson VL, Goudreau PN. 2000. Two-component signal transduction. *Annu Rev*  
700 *Biochem* 69:183-215.
- 701 3. Miller MB, Bassler BL. 2001. Quorum sensing in bacteria. *Annu Rev Microbiol* 55:165-99.
- 702 4. Beier D, Gross R. 2006. Regulation of bacterial virulence by two-component systems. *Curr Opin*  
703 *Microbiol* 9:143-52.
- 704 5. Hoch JA. 2000. Two-component and phosphorelay signal transduction. *Curr Opin Microbiol* 3:165-  
705 70.
- 706 6. Skerker JM, Prasol MS, Perchuk BS, Biondi EG, Laub MT. 2005. Two-component signal transduction  
707 pathways regulating growth and cell cycle progression in a bacterium: a system-level analysis. *PLoS*  
708 *Biol* 3:e334.
- 709 7. Mitrophanov AY, Groisman EA. 2008. Signal integration in bacterial two-component regulatory  
710 systems. *Genes Dev* 22:2601-11.
- 711 8. Goulian M. 2010. Two-component signaling circuit structure and properties. *Curr Opin Microbiol*  
712 13:184-9.
- 713 9. Jung K, Fried L, Behr S, Heermann R. 2012. Histidine kinases and response regulators in networks.  
714 *Curr Opin Microbiol* 15:118-24.
- 715 10. Lange R, Wagner C, de Saizieu A, Flint N, Molnos J, Stieger M, Caspers P, Kamber M, Keck W,  
716 Amrein KE. 1999. Domain organization and molecular characterization of 13 two-component  
717 systems identified by genome sequencing of *Streptococcus pneumoniae*. *Gene* 237:223-34.
- 718 11. Throup JP, Koretke KK, Bryant AP, Ingraham KA, Chalker AF, Ge Y, Marra A, Wallis NG, Brown JR,  
719 Holmes DJ, Rosenberg M, Burnham MK. 2000. A genomic analysis of two-component signal  
720 transduction in *Streptococcus pneumoniae*. *Mol Microbiol* 35:566-76.
- 721 12. Paterson GK, Blue CE, Mitchell TJ. 2006. Role of two-component systems in the virulence of  
722 *Streptococcus pneumoniae*. *J Med Microbiol* 55:355-63.
- 723 13. Guenzi E, Hakenbeck R. 1995. Genetic competence and susceptibility to beta-lactam antibiotics in  
724 *Streptococcus pneumoniae* R6 are linked via a two-component signal-transducing system *cia*. *Dev*  
725 *Biol Stand* 85:125-8.
- 726 14. Havarstein LS, Coomaraswamy G, Morrison DA. 1995. An unmodified heptadecapeptide  
727 pheromone induces competence for genetic transformation in *Streptococcus pneumoniae*. *Proc*  
728 *Natl Acad Sci U S A* 92:11140-4.
- 729 15. Havarstein LS, Diep DB, Nes IF. 1995. A family of bacteriocin ABC transporters carry out proteolytic  
730 processing of their substrates concomitant with export. *Mol Microbiol* 16:229-40.
- 731 16. Giammarinaro P, Sicard M, Gasc AM. 1999. Genetic and physiological studies of the *CiaH-CiaR* two-  
732 component signal-transducing system involved in cefotaxime resistance and competence of  
733 *Streptococcus pneumoniae*. *Microbiology* 145 ( Pt 8):1859-69.
- 734 17. Mascher T, Zahner D, Merai M, Balmelle N, de Saizieu AB, Hakenbeck R. 2003. The *Streptococcus*  
735 *pneumoniae* *cia* regulon: *CiaR* target sites and transcription profile analysis. *JBacteriol* 185:60-70.
- 736 18. Cortes PR, Pinas GE, Cian MB, Yandar N, Echenique J. 2015. Stress-triggered signaling affecting  
737 survival or suicide of *Streptococcus pneumoniae*. *Int J Med Microbiol* 305:157-69.
- 738 19. Mohedano ML, Overweg K, de la Fuente A, Reuter M, Altabe S, Mulholland F, de Mendoza D, Lopez  
739 P, Wells JM. 2005. Evidence that the essential response regulator *YycF* in *Streptococcus*  
740 *pneumoniae* modulates expression of fatty acid biosynthesis genes and alters membrane  
741 composition. *J Bacteriol* 187:2357-67.

- 742 20. Ng WL, Tsui HC, Winkler ME. 2005. Regulation of the *pspA* virulence factor and essential *pcsB*  
743 murein biosynthetic genes by the phosphorylated VicR (YycF) response regulator in *Streptococcus*  
744 *pneumoniae*. J Bacteriol 187:7444-7459.
- 745 21. Gutu AD, Wayne KJ, Sham LT, Winkler ME. 2010. Kinetic characterization of the WalRKSpn (VicRK)  
746 two-component system of *Streptococcus pneumoniae*: dependence of WalkSpn (VicK)  
747 phosphatase activity on its PAS domain. J Bacteriol 192:2346-58.
- 748 22. Ng W-L, Robertson GT, Kazmierczak KM, Zhao J, Gilmour R, Winkler ME. 2003. Constitutive  
749 expression of PcsB suppresses the requirement for the essential VicR (YycF) response regulator in  
750 *Streptococcus pneumoniae* R6. Molecular Microbiology 50:1647-1663.
- 751 23. Ng WL, Kazmierczak KM, Winkler ME. 2004. Defective cell wall synthesis in *Streptococcus*  
752 *pneumoniae* R6 depleted for the essential PcsB putative murein hydrolase or the VicR (YycF)  
753 response regulator. Mol Microbiol 53:1161-75.
- 754 24. McKessar SJ, Hakenbeck R. 2007. The two-component regulatory system TCS08 is involved in  
755 cellobiose metabolism of *Streptococcus pneumoniae* R6. J Bacteriol 189:1342-50.
- 756 25. Sun F, Li C, Jeong D, Sohn C, He C, Bae T. 2010. In the *Staphylococcus aureus* two-component  
757 system *sae*, the response regulator SaeR binds to a direct repeat sequence and DNA binding  
758 requires phosphorylation by the sensor kinase SaeS. J Bacteriol 192:2111-27.
- 759 26. Liu Q, Cho H, Yeo WS, Bae T. 2015. The extracytoplasmic linker peptide of the sensor protein SaeS  
760 tunes the kinase activity required for staphylococcal virulence in response to host signals. PLoS  
761 Pathog 11:e1004799.
- 762 27. Liu Q, Yeo WS, Bae T. 2016. The SaeRS Two-Component System of *Staphylococcus aureus*. Genes  
763 (Basel) 7.
- 764 28. Song XM, Connor W, Hokamp K, Babiuk LA, Potter AA. 2009. The growth phase-dependent  
765 regulation of the pilus locus genes by two-component system TCS08 in *Streptococcus pneumoniae*.  
766 Microb Pathog 46:28-35.
- 767 29. Pribyl T, Moche M, Dreisbach A, Bijlsma JJ, Saleh M, Abdullah MR, Hecker M, van Dijl JM, Becher  
768 D, Hammerschmidt S. 2014. Influence of impaired lipoprotein biogenesis on surface and  
769 exoproteome of *Streptococcus pneumoniae*. J Proteome Res 13:650-67.
- 770 30. Kloosterman TG, Kuipers OP. 2011. Regulation of arginine acquisition and virulence gene  
771 expression in the human pathogen *Streptococcus pneumoniae* by transcription regulators ArgR1  
772 and AhrC. J Biol Chem 286:44594-605.
- 773 31. Schulz C, Gierok P, Petruschka L, Lalk M, Mader U, Hammerschmidt S. 2014. Regulation of the  
774 arginine deiminase system by ArgR2 interferes with arginine metabolism and fitness of  
775 *Streptococcus pneumoniae*. MBio 5.
- 776 32. Jensch I, Gamez G, Rothe M, Ebert S, Fulde M, Somplatzki D, Bergmann S, Petruschka L, Rohde M,  
777 Nau R, Hammerschmidt S. 2010. PavB is a surface-exposed adhesin of *Streptococcus pneumoniae*  
778 contributing to nasopharyngeal colonization and airways infections. Mol Microbiol 77:22-43.
- 779 33. Kanwal S, Jensch I, Palm GJ, Bronstrup M, Rohde M, Kohler TP, Somplatzki D, Tegge W, Jenkinson  
780 HF, Hammerschmidt S. 2017. Mapping the recognition domains of pneumococcal fibronectin-  
781 binding proteins PavA and PavB demonstrates a common pattern of molecular interactions with  
782 fibronectin type III repeats. Mol Microbiol 105:839-859.
- 783 34. LeMieux J, Hava DL, Basset A, Camilli A. 2006. RrgA and RrgB are components of a multisubunit  
784 pilus encoded by the *Streptococcus pneumoniae* *rlrA* pathogenicity islet. Infect Immun 74:2453-6.
- 785 35. Tettelin H, Nelson KE, Paulsen IT, Eisen JA, Read TD, Peterson S, Heidelberg J, DeBoy RT, Haft DH,  
786 Dodson RJ, Durkin AS, Gwinn M, Kolonay JF, Nelson WC, Peterson JD, Umayam LA, White O,  
787 Salzberg SL, Lewis MR, Radune D, Holtzapple E, Khouri H, Wolf AM, Utterback TR, Hansen CL,  
788 McDonald LA, Feldblyum TV, Angiuoli S, Dickinson T, Hickey EK, Holt IE, Loftus BJ, Yang F, Smith

- 789 HO, Venter JC, Dougherty BA, Morrison DA, Hollingshead SK, Fraser CM. 2001. Complete genome  
790 sequence of a virulent isolate of *Streptococcus pneumoniae*. *Science* 293:498-506.
- 791 36. Hava DL, Camilli A. 2002. Large-scale identification of serotype 4 *Streptococcus pneumoniae*  
792 virulence factors. *Mol Microbiol* 45:1389-406.
- 793 37. Gomez-Mejia A, Gamez G, Hammerschmidt S. 2017. *Streptococcus pneumoniae* two-component  
794 regulatory systems: The interplay of the pneumococcus with its environment. *Int J Med Microbiol*  
795 doi:10.1016/j.ijmm.2017.11.012.
- 796 38. Park AK, Moon JH, Oh JS, Lee KS, Chi YM. 2013. Crystal structure of the response regulator *spr1814*  
797 from *Streptococcus pneumoniae* reveals unique interdomain contacts among NarL family proteins.  
798 *Biochem Biophys Res Commun* 434:65-9.
- 799 39. Maule AF, Wright DP, Weiner JJ, Han L, Peterson FC, Volkman BF, Silvaggi NR, Ulijasz AT. 2015. The  
800 aspartate-less receiver (ALR) domains: distribution, structure and function. *PLoS Pathog*  
801 11:e1004795.
- 802 40. Nguyen MP, Yoon JM, Cho MH, Lee SW. 2015. Prokaryotic 2-component systems and the  
803 OmpR/PhoB superfamily. *Can J Microbiol* 61:799-810.
- 804 41. Ericson ME, Subramanian C, Frank MW, Rock CO. 2017. Role of Fatty Acid Kinase in Cellular Lipid  
805 Homeostasis and SaeRS-Dependent Virulence Factor Expression in *Staphylococcus aureus*. *mBio*  
806 8:e00988-17.
- 807 42. Brown JS, Gilliland SM, Ruiz-Albert J, Holden DW. 2002. Characterization of pit, a *Streptococcus*  
808 *pneumoniae* iron uptake ABC transporter. *Infect Immun* 70:4389-98.
- 809 43. Tseng HJ, McEwan AG, Paton JC, Jennings MP. 2002. Virulence of *Streptococcus pneumoniae*: PsaA  
810 mutants are hypersensitive to oxidative stress. *Infect Immun* 70:1635-1639.
- 811 44. Kerr AR, Adrian PV, Estevao S, de Groot R, Alloing G, Claverys JP, Mitchell TJ, Hermans PW. 2004.  
812 The Ami-AliA/AliB permease of *Streptococcus pneumoniae* is involved in nasopharyngeal  
813 colonization but not in invasive disease. *Infect Immun* 72:3902-6.
- 814 45. Lu Y-J, Rock CO. 2006. Transcriptional regulation of fatty acid biosynthesis in *Streptococcus*  
815 *pneumoniae*. *Molecular Microbiology* 59:551-566.
- 816 46. Nobbs AH, Lamont RJ, Jenkinson HF. 2009. *Streptococcus* adherence and colonization. *Microbiol*  
817 *Mol Biol Rev* 73:407-50, Table of Contents.
- 818 47. Richardson AR, Somerville GA, Sonenshein AL. 2015. Regulating the Intersection of Metabolism  
819 and Pathogenesis in Gram-positive Bacteria. *Microbiol Spectr* 3.
- 820 48. Mainiero M, Goerke C, Geiger T, Gonser C, Herbert S, Wolz C. 2010. Differential Target Gene  
821 Activation by the *Staphylococcus aureus* Two-Component System saeRS. *Journal of Bacteriology*  
822 192:613-623.
- 823 49. Sun F, Li C, Jeong D, Sohn C, He C, Bae T. 2010. In the *Staphylococcus aureus* Two-Component  
824 System sae, the Response Regulator SaeR Binds to a Direct Repeat Sequence and DNA Binding  
825 Requires Phosphorylation by the Sensor Kinase SaeS. *Journal of Bacteriology* 192:2111-2127.
- 826 50. Kloosterman TG, Witwicki RM, van der Kooi-Pol MM, Bijlsma JJ, Kuipers OP. 2008. Opposite effects  
827 of Mn<sup>2+</sup> and Zn<sup>2+</sup> on PsaR-mediated expression of the virulence genes *pcpA*, *prtA*, and *psaBCA* of  
828 *Streptococcus pneumoniae*. *J Bacteriol* 190:5382-93.
- 829 51. Shafeeq S, Kloosterman TG, Kuipers OP. 2011. CelR-mediated activation of the cellobiose-  
830 utilization gene cluster in *Streptococcus pneumoniae*. *Microbiology* 157:2854-61.
- 831 52. Lu YJ, Rock CO. 2006. Transcriptional regulation of fatty acid biosynthesis in *Streptococcus*  
832 *pneumoniae*. *Mol Microbiol* 59:551-66.
- 833 53. McCluskey J, Hinds J, Husain S, Witney A, Mitchell TJ. 2004. A two-component system that controls  
834 the expression of pneumococcal surface antigen A (PsaA) and regulates virulence and resistance  
835 to oxidative stress in *Streptococcus pneumoniae*. *Mol Microbiol* 51:1661-75.



- 836 54. Johnston JW, Briles DE, Myers LE, Hollingshead SK. 2006. Mn<sup>2+</sup>-Dependent Regulation of Multiple  
837 Genes in *Streptococcus pneumoniae* through PsaR and the Resultant Impact on Virulence.  
838 *Infection and Immunity* 74:1171-1180.
- 839 55. Frankel MB, Wojcik BM, DeDent AC, Missiakas DM, Schneewind O. 2010. ABI domain-containing  
840 proteins contribute to surface protein display and cell division in *Staphylococcus aureus*. *Mol*  
841 *Microbiol* 78:238-52.
- 842 56. Blue CE, Mitchell TJ. 2003. Contribution of a Response Regulator to the Virulence of *Streptococcus*  
843 *pneumoniae* Is Strain Dependent. *Infection and Immunity* 71:4405-4413.
- 844 57. Laux A, Sexauer A, Sivaselvarajah D, Kaysen A, Bruckner R. 2015. Control of competence by related  
845 non-coding csRNAs in *Streptococcus pneumoniae* R6. *Front Genet* 6:246.
- 846 58. Cassone M, Gagne AL, Spruce LA, Seeholzer SH, Seibert ME. 2012. The HtrA Protease from  
847 *Streptococcus pneumoniae* Digests Both Denatured Proteins and the Competence-stimulating  
848 Peptide. *The Journal of Biological Chemistry* 287:38449-38459.
- 849 59. Jeong D-W, Cho H, Jones MB, Shatzkes K, Sun F, Ji Q, Liu Q, Peterson SN, He C, Bae T. 2012. The  
850 auxiliary protein complex SaePQ activates the phosphatase activity of sensor kinase SaeS in the  
851 SaeRS two-component system of *Staphylococcus aureus*. *Molecular microbiology* 86:331-348.
- 852 60. Winter T, Winter J, Polak M, Kusch K, Mäder U, Sietmann R, Ehlbeck J, van Hijum S, Weltmann KD,  
853 Hecker M, Kusch H. 2011. Characterization of the global impact of low temperature gas plasma on  
854 vegetative microorganisms. *PROTEOMICS* 11:3518-3530.
- 855 61. Kohler S, Voss F, Gomez Mejia A, Brown JS, Hammerschmidt S. 2016. Pneumococcal lipoproteins  
856 involved in bacterial fitness, virulence, and immune evasion. *FEBS Lett* 590:3820-3839.

857

858

859

860

861

862

863

864

865

866

867

868

869

870 **FIGURE LEGENDS**

871 **FIG 1** Growth behavior of pneumococcal *tcs08*-mutants.

872 Growth in CDM of *S. pneumoniae* S.p. TIGR4 $\Delta$ *cps* and *S.p.* D39 $\Delta$ *cps* parental  
873 strains versus (A and D)  $\Delta$ *rr08*-, (B and E)  $\Delta$ *hk08*- and (C and F)  $\Delta$ *tcs08*-mutants,  
874 respectively. The symbol “g” indicates generation time. An unpaired two-tailed T-test  
875 was used with the generation times for statistics and the error bars indicate the standard  
876 deviation (SD) for n=3. The “\*” symbol indicates statistical significance among the  
877 generation time of the different strains with p<0.05.

878

879 **FIG 2** Gene expression heatmap for TIGR4 wild-type and isogenic *tcs08*-mutants.

880 Results output for the microarray study using *S.p.* TIGR4 $\Delta$ *cps* and its  
881 corresponding *tcs08*-mutants. The heat map indicates alterations in gene expression,  
882 where upregulation is indicated by green and down regulation by red colors. ☆ indicates  
883 p-values < 0.05, ☆ ☆ indicates q-values < 0.05. Where q indicates False Discovery Rate  
884 statistic result.

885

886 **FIG 3** Impact of pneumococcal TCS08 on gene expression by real-time PCR.

887 Differential gene expression in *tcs08*-mutants ( $-\Delta$ *rr08*,  $-\Delta$ *hk08*,  $-\Delta$ *tcs08*) analyzed  
888 by qPCR after pneumococcal cultivation in CDM. (A) *S. p.* TIGR4 $\Delta$ *cps* and (B) D39 $\Delta$ *cps*.  
889 Specific primers for the ribosomal protein S16 (*sp\_0775*) were used as normalization  
890 control. Data indicates the  $\Delta\Delta$ Ct of the fold change in the graph bar and heatmap for the  
891 different *tcs08*-mutants from three independent experiments. D39 $\Delta$ *cps* or TIGR4 $\Delta$ *cps*  
892 wild-type were normalized to 0 and used for statistical analysis with the unpaired

893 student's t-test. \* and ☆ symbols indicate p-values < 0.05 in both graph and heatmap for  
894 n=3, respectively. Data are presented as boxes and whiskers with the median and 95%  
895 confidence intervals.

896

897 **FIG 4** Protein expression levels in pneumococcal *tcs08*-deficient strains.

898 Quantification of different proteins in pneumococci by immunoblotting in (A) *S.p.*  
899 TIGR4Δ*cps* and (B) *S.p.* D39Δ*cps* and their corresponding isogenic *tcs08* mutants. The  
900 unpaired student's t-test was applied and the enolase of D39Δ*cps* or TIGR4Δ*cps* were  
901 used as reference. \* indicates p-values < 0.05, n= number of biological replicates, the  
902 horizontal segmented lines indicate the 2-fold change and the error bars indicate the  
903 SD.

904

905 **FIG 5** Impact of HK08 and RR08 on the abundance of pneumococcal surface proteins.

906 The surface expression and abundance of surface proteins was analyzed by flow-  
907 cytometry in (A) *S. p.* TIGR4Δ*cps* and (B) *S. p.* D39Δ*cps* strains and their corresponding  
908 isogenic *tcs08*-mutants, all cultured in CDM. The unpaired student's t-test was applied  
909 for the statistics and D39Δ*cps* or TIGR4Δ*cps* were used as reference accordingly. ns  
910 indicates "no significant", \* p-value<0.05 for n = 3 and the error bars indicate the SD.

911

912 **FIG 6** Sequence comparison of upstream regions from the genes *pavB*, *saeP* and *fnbA*.

913 An *in silico* alignment was performed using 300 bp upstream of the pneumococcal *pavB*  
914 and the staphylococcal *saeP* and *fnbA* genes. The arrows indicate the distance  
915 upstream from the starting ATG. The bold letters in the gray boxes highlight the SaeR

916 binding motifs in all sequences. The alignment was done using the Clustal omega tool  
917 from the EMBL-EBI. The DNA sequences were retrieved from the Kyoto Encyclopedia  
918 for Genes and Genomes (KEGG). The “\*” (star) symbol indicates a conserved base pair.

919

920 **FIG 7** Influence of the TCS08 components on pneumococcal pathogenesis.

921 CD-1 mice were used in the acute pneumonia model to determine the impact of the  
922 TCS08 components on virulence. Infection doses of  $1 \times 10^7$  and  $7 \times 10^7$  bacteria were  
923 applied for *S.p.* D39 and TIGR4, respectively. (A and B) Bioluminescent (*lux*) strains  
924 were used to monitor the progression of the disease *in vivo*. The results are shown as  
925 (C and D) photon flux change and (E and F) analyzed by a Kaplan-Meier plot (G and H).  
926 For the sepsis model,  $1 \times 10^3$  bacteria were used as infection dose for both wild-type  
927 strains and corresponding mutants. A log-rank test was used for the statistical test with a  
928 group size of  $n=12$  (D39) or  $n=10$  (TIGR4) and the error bars indicate the SD.

929

930

931

932

933

934

935

936

937

938 **SUPPLEMENTS**

939 **Figure Legends**

940

941 **FIG S1** Generation of pneumococcal *tcs08*-mutants.

942 (A) Schematic model of the gene organization and insertion deletion  
943 mutagenesis by allelic replacement of the *tcs08* operon in *S. pneumoniae* TIGR4 as  
944 an example for all produced mutants. An *in silico* search for operon conformation  
945 identified the transcription start and terminator for the *tcs08* operon as indicated by  
946 the black arrow and lollipop, respectively. (B) Mutants were also confirmed by real-  
947 time PCR (qPCR). Specific primers were used for the *rr08* and *hk08*. Additionally, the  
948 ribosomal protein S16 (*sp\_0775*) was used as control.

949

950 **FIG S2** Coinfection assay with TIGR4 wild-type and isogenic *tcs08*-mutants.

951 Competition assays between wild-type and TCS08 mutants were carried out in  
952 *S. p.* TIGR4. CD-1 mice were intranasally inoculated with a mixture of bioluminescent  
953 TIGR4 and each *tcs08*-mutant with an infection dose of  $2.5 \times 10^7$  of each strain. Mice  
954 were sacrificed and the samples were collected after 24 and 48 hours. Colony  
955 determination were plotted as the mutant/wild-type ratio to determine the CI for the  
956 (A) nasopharyngeal and the (B) bronchoalveolar lavages. Results are displayed as  
957 scatter plots with each dot representing one mice and the solid line indicating the  
958 median.

959

960

961 **FIG S3** Localization, orientation and grouping of the regulated genes by the  
962 pneumococcal TCS08.

963 Genes under regulation by the pneumococcal TCS08 are illustrated in a linear  
964 representation of the genome of *Streptococcus pneumoniae*. The left panel indicates  
965 the localization and orientation of each gene, where localization on the positive  
966 strand is indicated by the red color and the negative strand is indicated with the blue  
967 color. The right panel of the figure groups the genes in 5 different biochemical  
968 categories according to the characterization suggested by the databases KEGG  
969 (Kyoto Encyclopedia of Genes and Genomes) and BacMap (Bacterial Map genome  
970 atlas): green indicates Environmental information processing (EIP), yellow indicates  
971 intermediary metabolism (IM), blue indicates colonization factors (CF), pink indicates  
972 genetic information processing (GIP), and gray indicates genes of unknown function  
973 (UF).

974

975 **FIG S4** Staphylococcal SaeRS and pneumococcal TCS08 sequence alignment

976 Amino acid sequence alignment between the histidine kinases and response  
977 regulators of the pneumococcal TCS08 and the staphylococcal SaeRS systems. The  
978 red colored residues indicate the reported histidine and aspartate residues for SaeS  
979 and SaeR, respectively. The sequence comparison was performed using the Clustal  
980 omega tool from the EMBL-EBI and the protein sequences were retrieved using the  
981 Kyoto Encyclopedia of Genes and Genomes (KEGG). The "\*" (star) symbol indicates  
982 a score of 1, the ":" (colon) indicates a score >0.5 and the single "." (period) indicates  
983 a score >0 and <0.5.

**S.p. TIGR4 $\Delta$ cps**

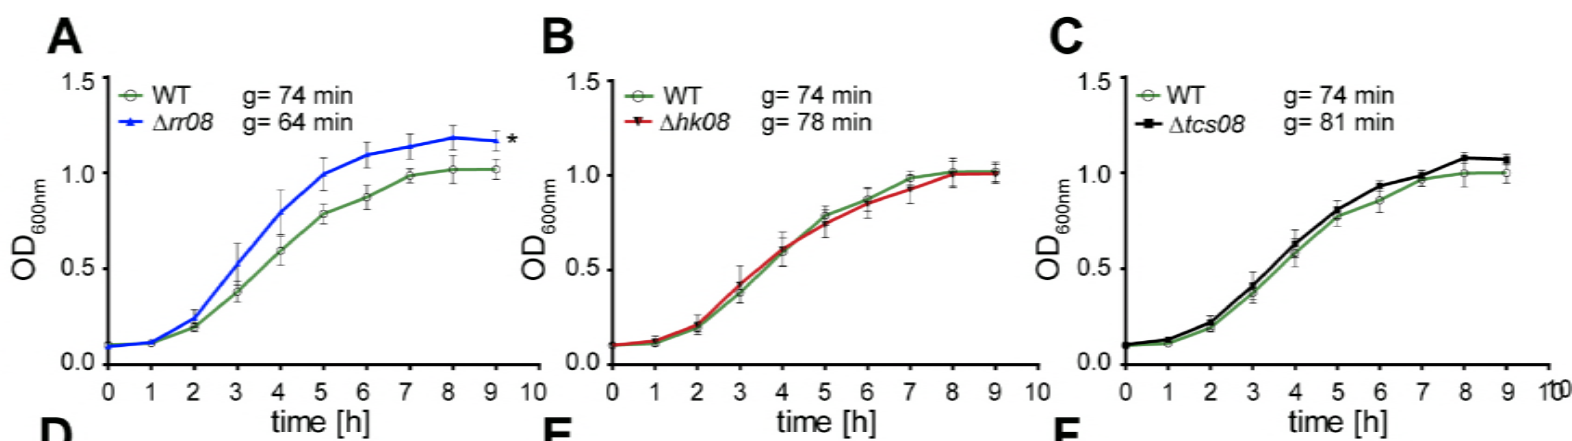

**S.p. D39 $\Delta$ cps**

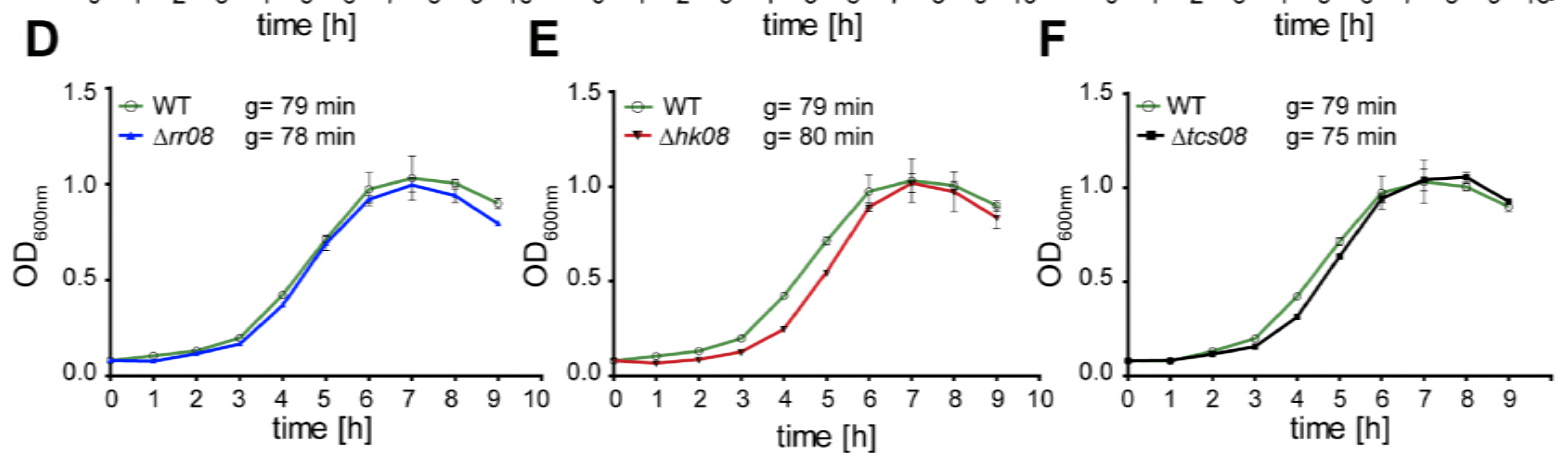

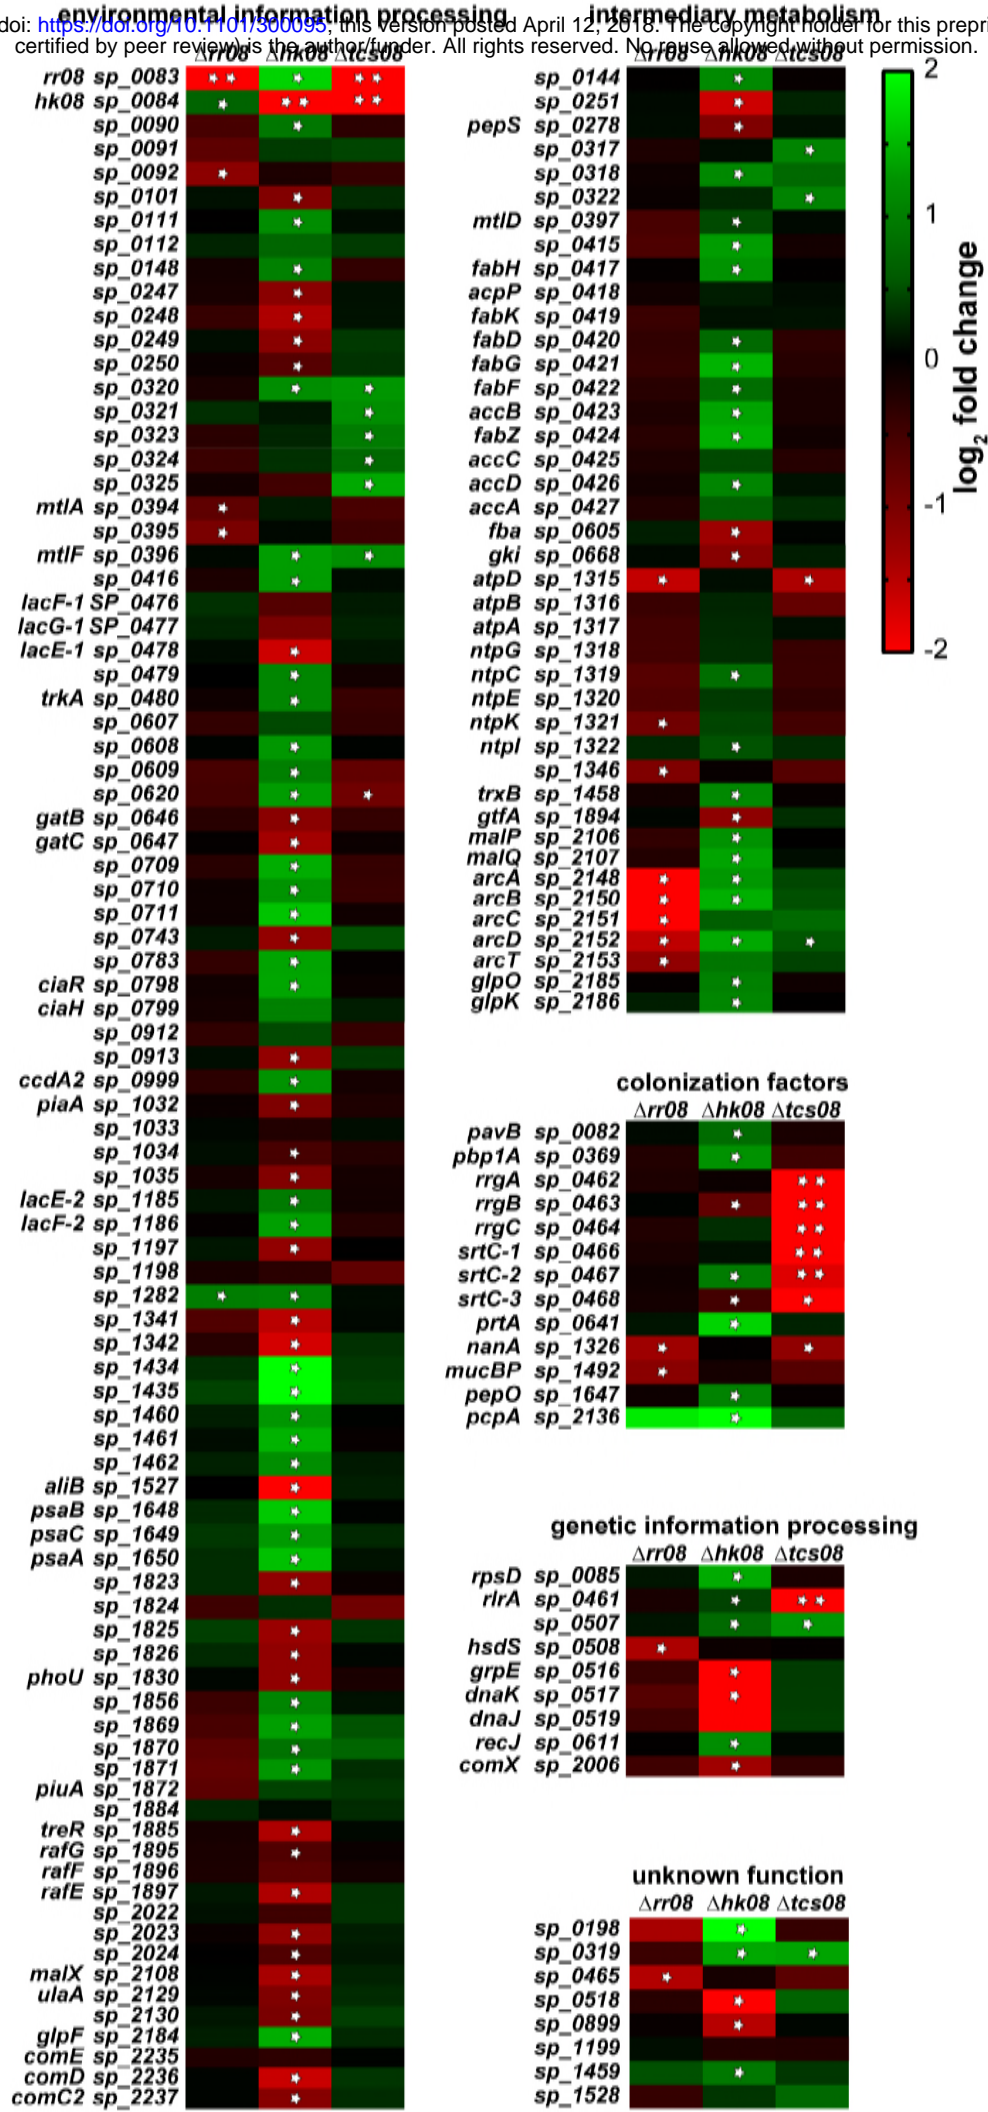



**A**

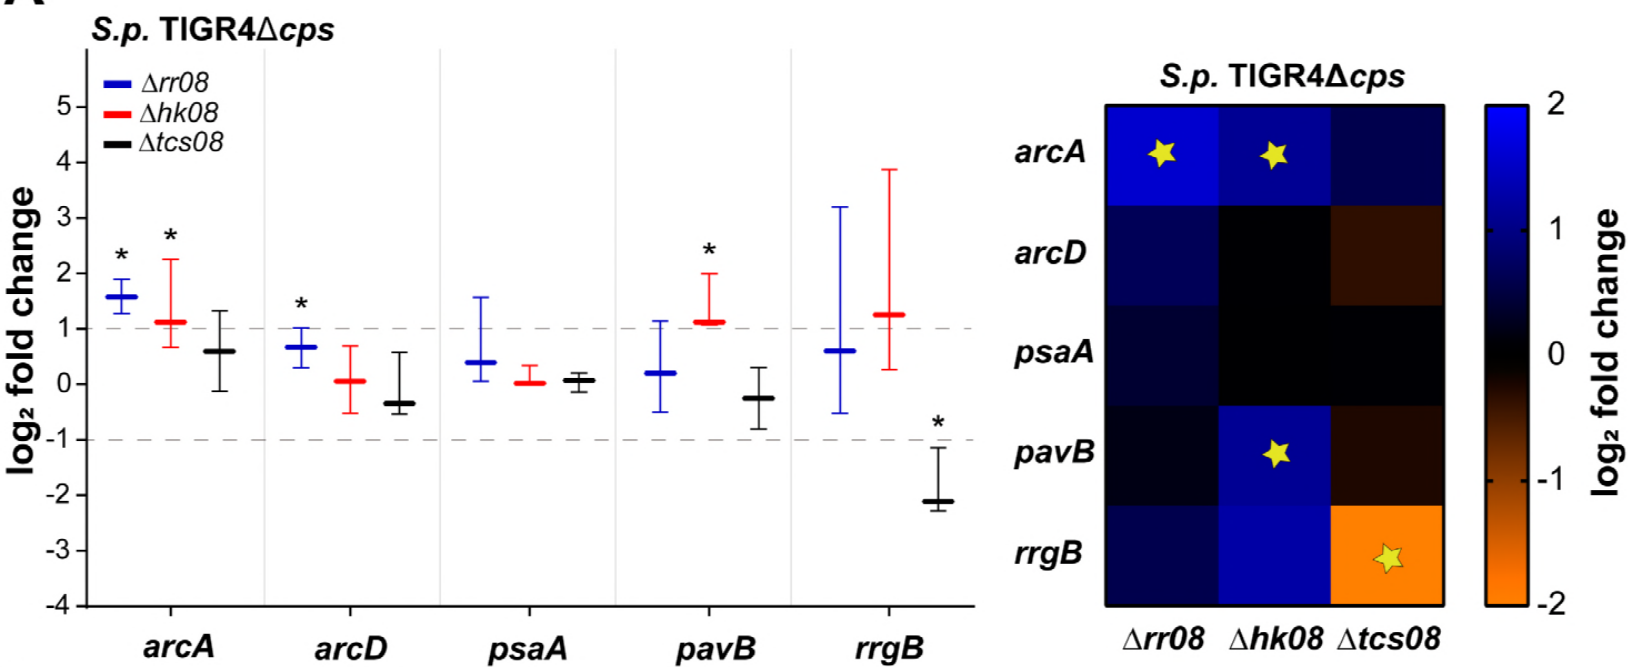

**B**

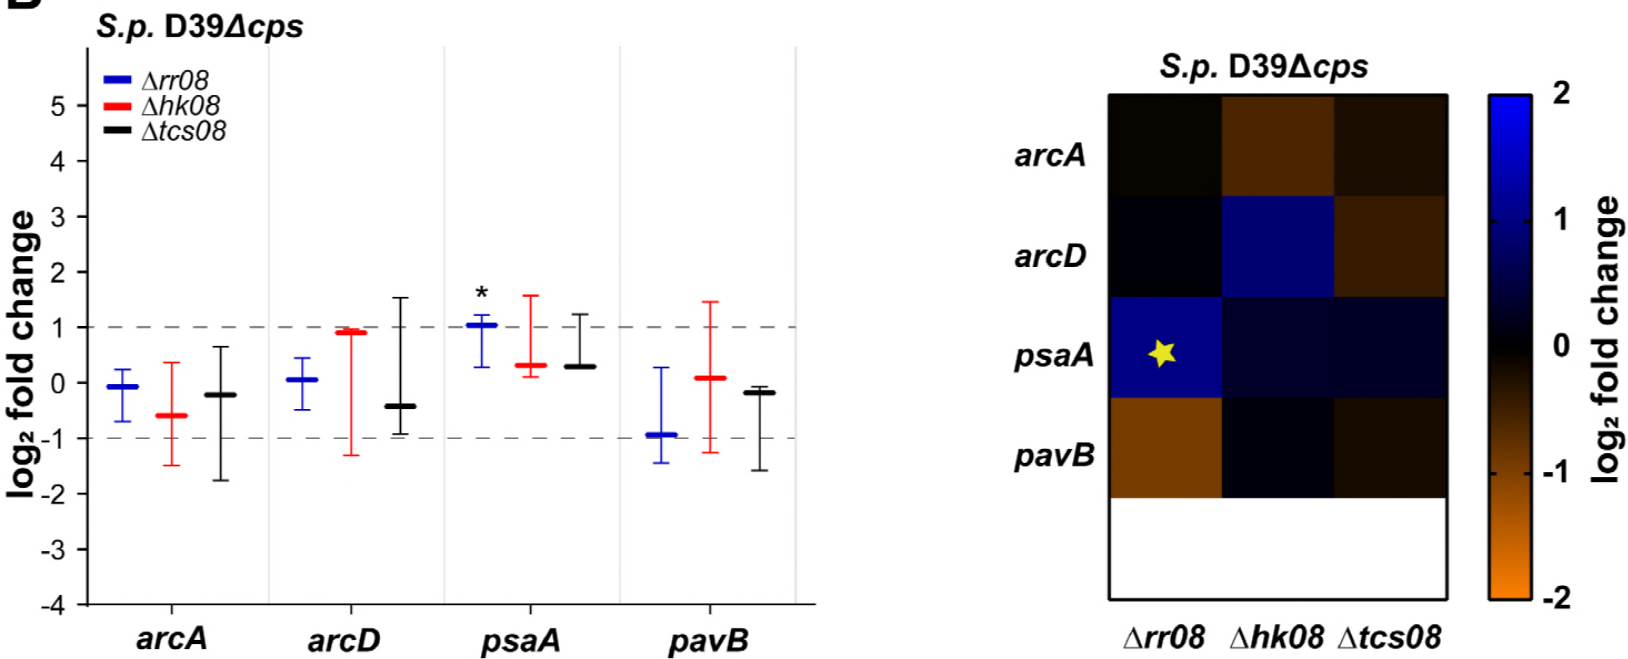

## A *S.p.* TIGR4 $\Delta$ *cps*

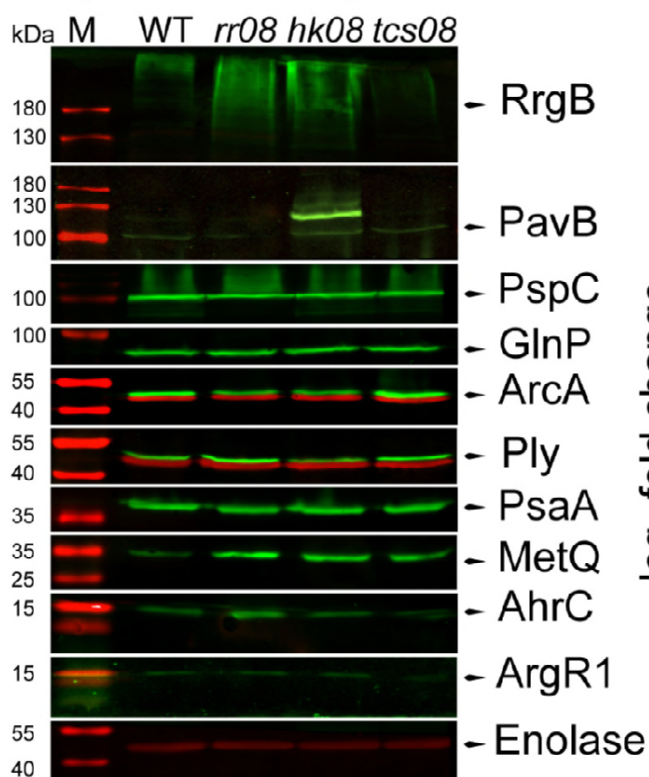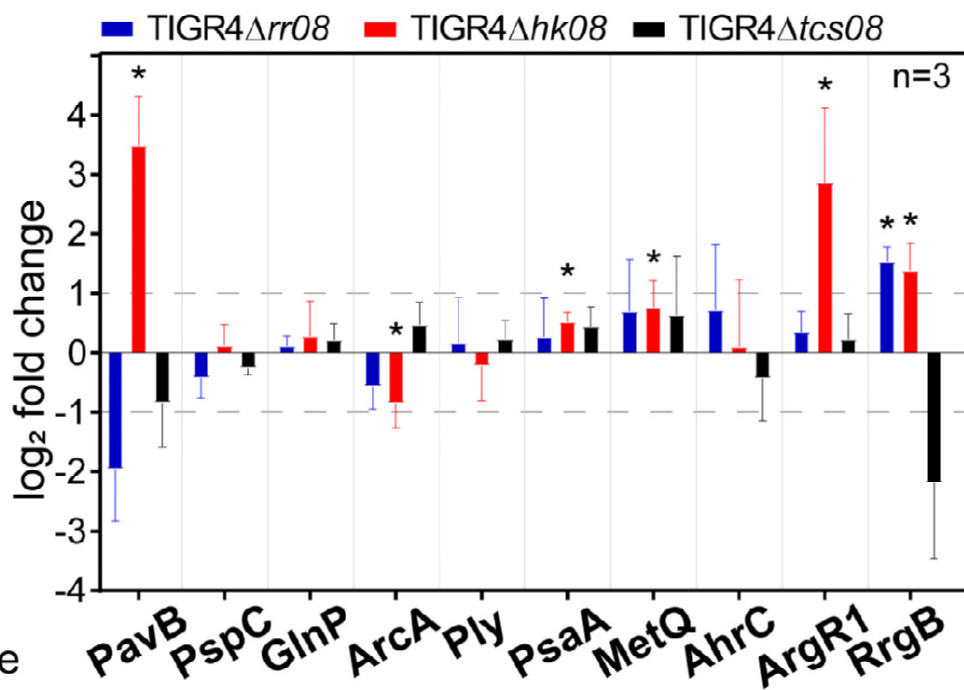

## B *S.p.* D39 $\Delta$ *cps*

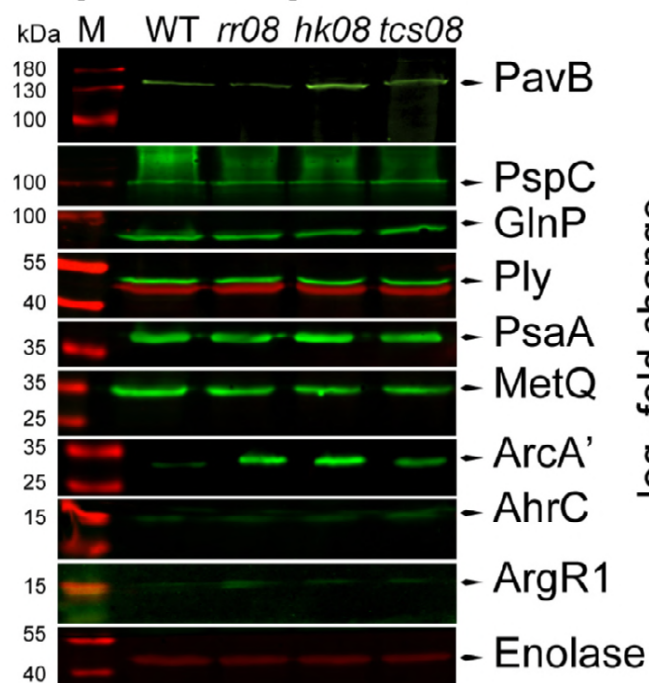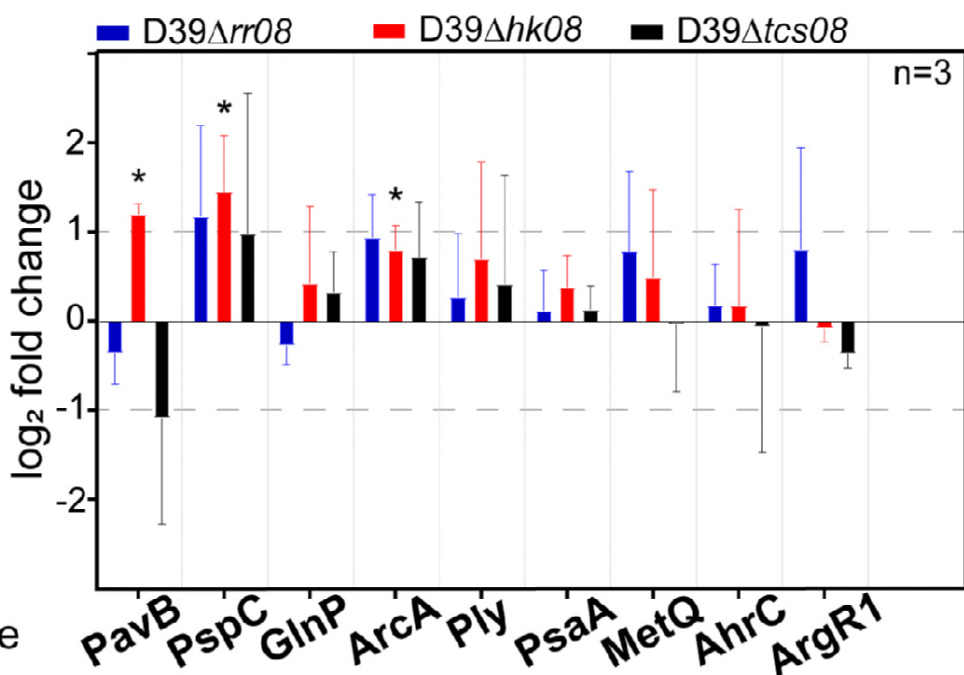

**A**

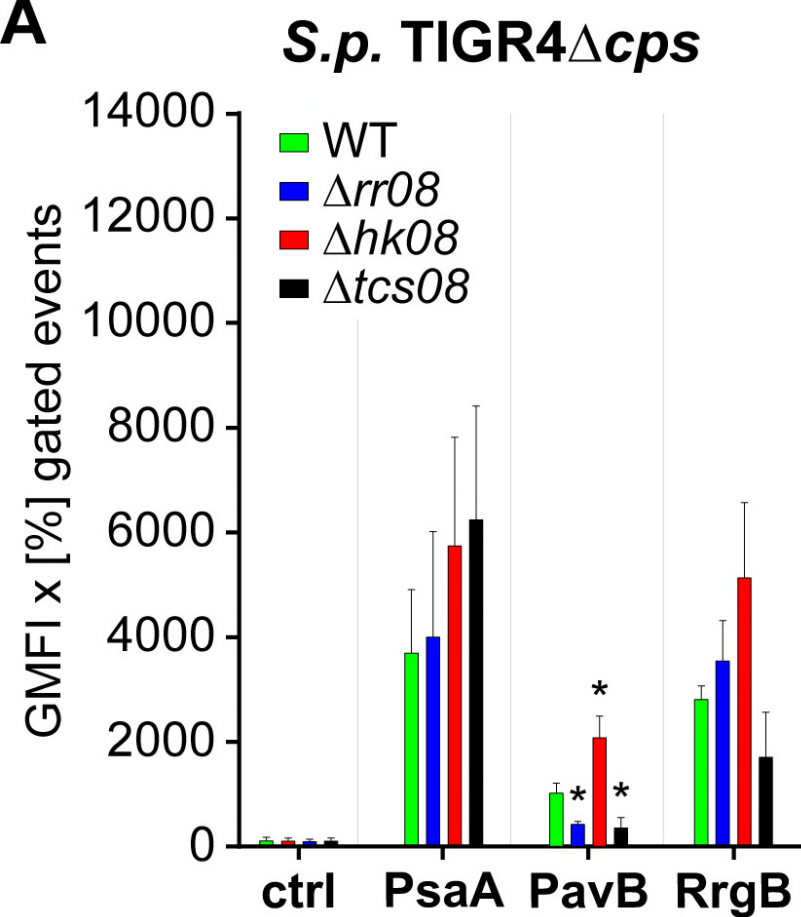

**B**

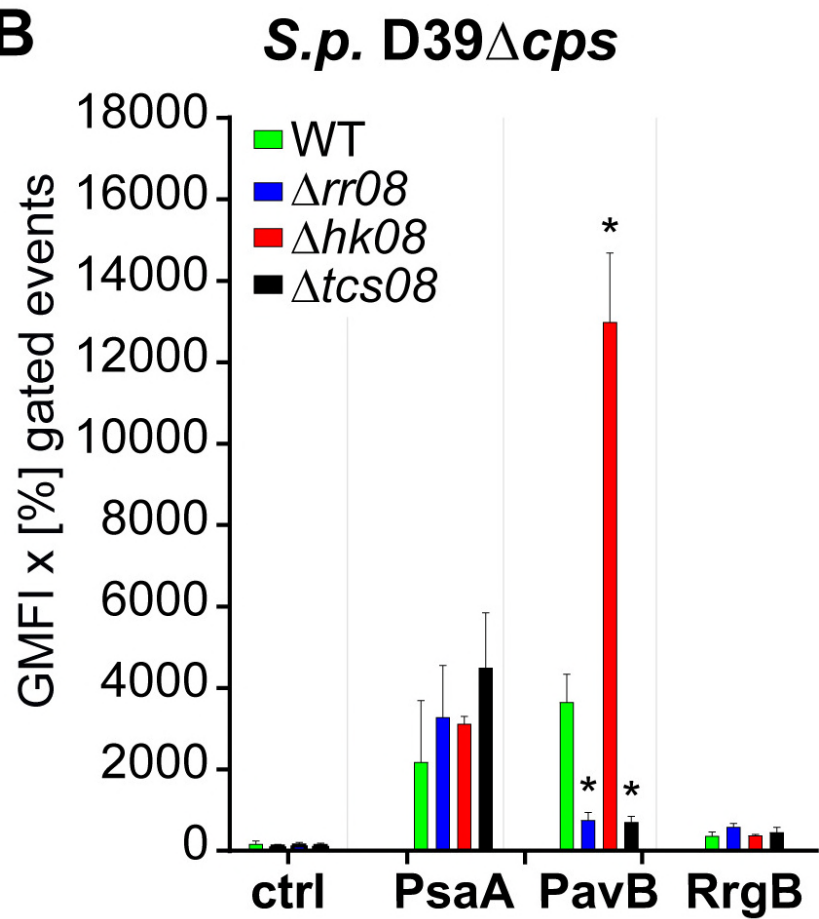

## *Streptococcus pneumoniae pavB* and *Staphylococcus aureus saeP* upstream regions

|               |                      |                      |            |            |                   |                   |                   |
|---------------|----------------------|----------------------|------------|------------|-------------------|-------------------|-------------------|
| <b>TIGR4</b>  | <i>sp0082_pavB</i>   | GAACAGCGGA           | GCATCTGGCA | -----AAAAA | ACGCCAATTG        | TGGACCTATA        | TTCAGCAGAA        |
| <b>Newman</b> | <i>nwmn0677_saeP</i> | CAAAAGGTTT           | ATAAATTTTA | ATACCAAAC  | TATTAACAC         | TTCTGATATT        | CTTAGTTCAA        |
|               |                      | * * *                | * * *      | ****       | **                | * **              | * ** *            |
|               |                      | ^<br>-314 bp         |            |            |                   |                   |                   |
| <b>TIGR4</b>  | <i>sp0082_pavB</i>   | AAATCCAGAA           | GTCTTTCAGG | CTATTCGTAA | GACCATGTTG        | AGCCGT----        | TTGACCAAAC        |
| <b>Newman</b> | <i>nwmn0677_saeP</i> | AATATCAGAA           | GTGTTTTATA | GTGTTATCTA | GTTTCAGATAA       | ATATTTCTT         | ACTTAAAAAA        |
|               |                      | ** *****             | ** ** *    | * ** *     | * ** *            | * *               | ***               |
|               |                      | ^<br>-254 bp         |            |            |                   |                   |                   |
| <b>TIGR4</b>  | <i>sp0082_pavB</i>   | ATTCTGTCTT           | GCCAGATCGC | AAACTGTCCA | ATGTCGTCTA        | TCAAATCACC        | AAATCTGTTT        |
| <b>Newman</b> | <i>nwmn0677_saeP</i> | ACGCCCTCCT           | CTTATTTTGA | CCCCTA---- | -----TTTAT        | TTAAATCAGA        | CAATTATTTT        |
|               |                      | * * ** *             | * * *      | **         | *                 | * ****            | *** **            |
|               |                      | ^<br>-194 bp         |            |            |                   |                   |                   |
| <b>TIGR4</b>  | <i>sp0082_pavB</i>   | ATGGATTTAA           | T-----TAAT | ATAAGTGTTC | <b>TATAAGAGGG</b> | <b>ATTTAAGAAA</b> | <b>AATTTTAACT</b> |
| <b>Newman</b> | <i>nwmn0677_saeP</i> | CATTTTCAA            | TTATTCCTTC | TTCAATATTA | <b>GTTAAGCGAT</b> | <b>ATTTAACGA</b>  | <b>AGTTAAGAAT</b> |
|               |                      | * ** *               | * *        | * ** *     | **** *            | ***** *           | * ** *            |
|               |                      | ^<br>-134 bp         |            |            |                   |                   |                   |
| <b>TIGR4</b>  | <i>sp0082_pavB</i>   | TTTTCTTAGT           | CCTTTTTAAT | TTCAGGAGAT | TATACTAGAG        | TCATCAAATA        | AAGAAAGACT        |
| <b>Newman</b> | <i>nwmn0677_saeP</i> | TAG <b>GTTAA</b> TGG | CATATTATT  | GCCTTCATTT | TAAACTTAAC        | TTATCAAATT        | GAAGAAATGA        |
|               |                      | * * * *              | * ** *     | * * *      | ** ** *           | * ****            | * **              |
|               |                      | ^<br>-74 bp          |            |            |                   |                   |                   |
| <b>TIGR4</b>  | <i>sp0082_pavB</i>   | CTAAGGAGAA           | TCCT       | <b>ATG</b> |                   |                   |                   |
| <b>Newman</b> | <i>nwmn0677_saeP</i> | GGAGTTAGC-           | ----       | <b>ATG</b> |                   |                   |                   |
|               |                      | * **                 |            |            |                   |                   |                   |
|               |                      | ^<br>-14 bp          |            |            |                   |                   |                   |

45,45% identity

## *Streptococcus pneumoniae pavB* and *Staphylococcus aureus fnbA* upstream regions

|               |                      |              |            |                     |                    |                    |                   |
|---------------|----------------------|--------------|------------|---------------------|--------------------|--------------------|-------------------|
| <b>TIGR4</b>  | <i>sp0082_pavB</i>   | -GAACAGCGG   | AGCATCTGGC | AAAAAACGC           | CAATTGTGGA         | CCTATATTCA         | GCAGAAAAAT        |
| <b>Newman</b> | <i>nwmn2399_fnbA</i> | TGTACAGGCG   | ATAATTATGA | AACGTTTAGT          | ATATTGTTT-         | -----TAAA          | TTAGATAATG        |
|               |                      | * **** *     | * ** *     | **                  | *                  | *****              | * * ** *          |
|               |                      | ^<br>-341 bp |            |                     |                    |                    |                   |
| <b>TIGR4</b>  | <i>sp0082_pavB</i>   | CCAGAAGT-C   | TTTCAGGCTA | TTCGTAAGAC          | CATGTTGAGC         | CGTTTGACCA         | AACATTCTGT        |
| <b>Newman</b> | <i>nwmn2399_fnbA</i> | ATTAATTTAA   | TTTAAAAAAA | TAAGTATAAA          | AAATACAAGC         | CTTGTGTGAC         | AAGGGTTTC-        |
|               |                      | * *          | *** *      | * ** *              | * **               | * * **             | ** * *            |
|               |                      | ^<br>-281 bp |            |                     |                    |                    |                   |
| <b>TIGR4</b>  | <i>sp0082_pavB</i>   | CTTGCCAGAT   | CGCAAACGT  | CCAATGTCGT          | CTATCAAATC         | ACCAAATCTG         | TTTATGGATT        |
| <b>Newman</b> | <i>nwmn2399_fnbA</i> | -----        | -----      | -TGATGACTT          | GAA-----           | -----TACAA         | TTTATAGGTA        |
|               |                      |              |            | *** ** *            | *                  | *                  | ***** * *         |
|               |                      | ^<br>-221 bp |            |                     |                    |                    |                   |
| <b>TIGR4</b>  | <i>sp0082_pavB</i>   | TAATT-----   | AATATAAGTG | TTTT <b>TATAAGA</b> | GGG <b>ATTTAAG</b> | AAAA <b>ATTTA</b>  | <b>ACTTTTTCTT</b> |
| <b>Newman</b> | <i>nwmn2399_fnbA</i> | TATTTCAAAT   | AATAAAATTA | TCA <b>ATTAACA</b>  | TAA <b>ATTAAT</b>  | GACA <b>ATCTTA</b> | <b>ACTTTTCATT</b> |
|               |                      | ** **        | **** * *   | * ** *              | * ****             | * ** *             | ***** **          |
|               |                      | ^<br>-161 bp |            |                     |                    |                    |                   |
| <b>TIGR4</b>  | <i>sp0082_pavB</i>   | AGTCCTTTTT   | AATTCAGGA  | GATTA-----          | ----TACTAG         | AGTCATCAAA         | TA-----           |
| <b>Newman</b> | <i>nwmn2399_fnbA</i> | AACTCGCTTT   | TTTGATTGC  | TTTTAAAAAC          | CGAACAATAT         | AGACTTGCAT         | TTATTAAGTT        |
|               |                      | * * **       | * * *      | ***                 | * **               | ** * * *           | * *               |
|               |                      | ^<br>-101 bp |            |                     |                    |                    |                   |
| <b>TIGR4</b>  | <i>sp0082_pavB</i>   | -----A       | A----GAAAG | ACTCTAAGGA          | GA-ATCCT--         | -                  | <b>ATG</b>        |
| <b>Newman</b> | <i>nwmn2399_fnbA</i> | TAAAAAATTA   | ATGAATTTTG | CATTTAAAGG          | GAGATATTAT         | A                  | <b>GTG</b>        |
|               |                      |              | * *        | * ** *              | ** ** *            |                    |                   |
|               |                      | ^<br>-41 bp  |            |                     |                    |                    |                   |

50,97 % identity

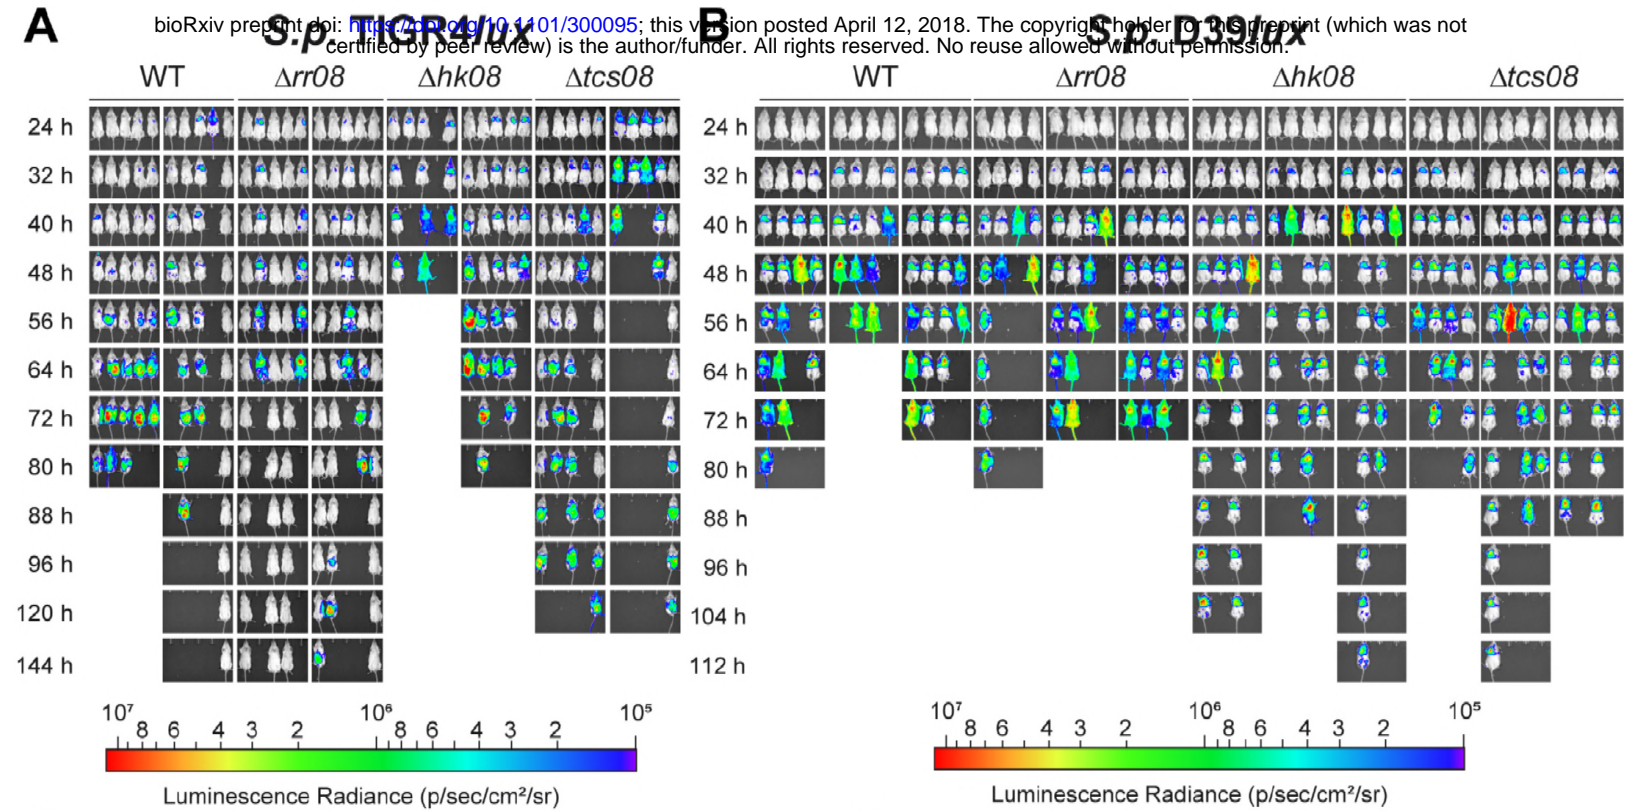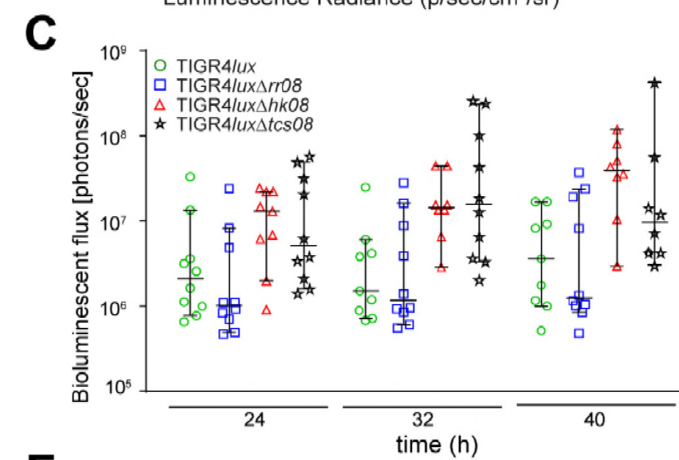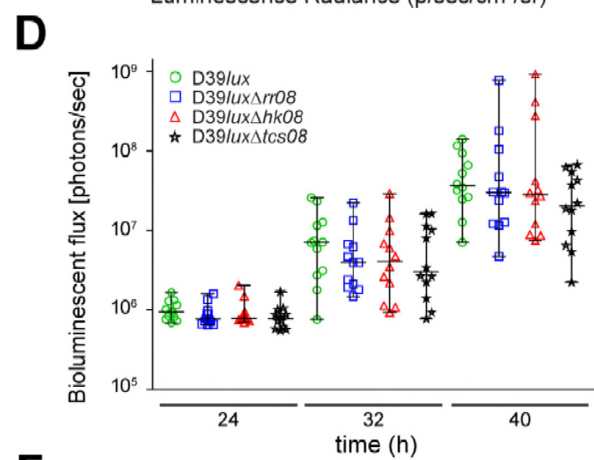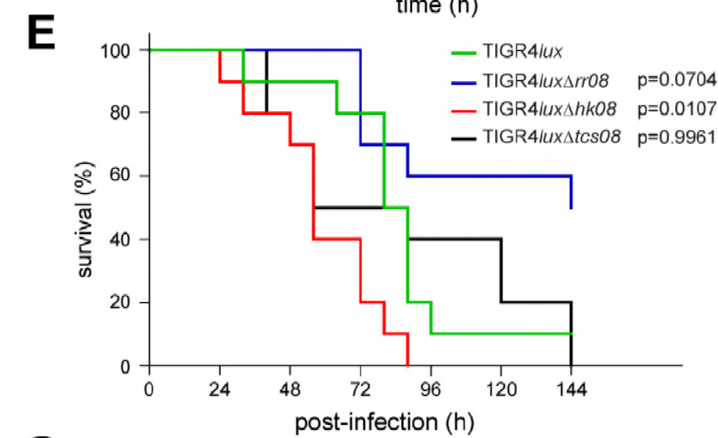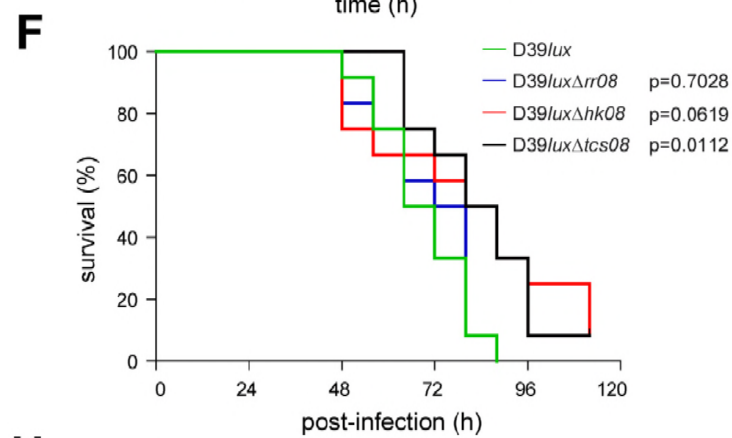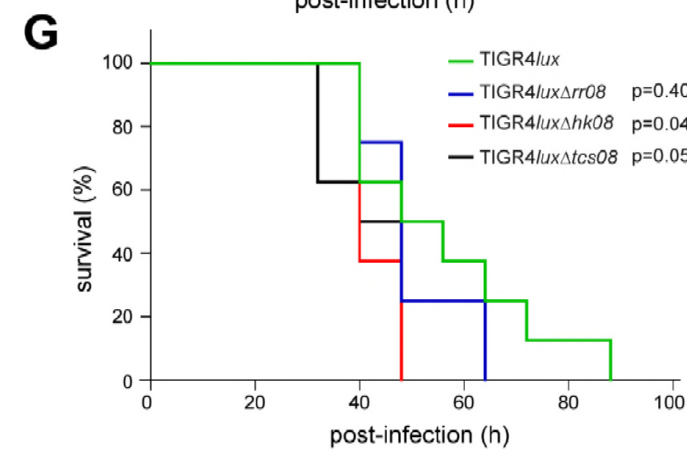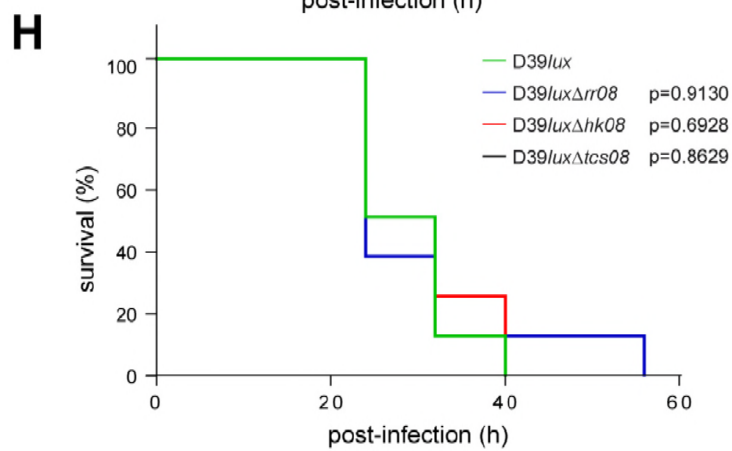

Source: https://www.biorxiv.org/content/10.1101/300095v1.full.pdf
